# Supplementary material for: Quaternary Selenides EuLnCuSe3: Synthesis, Structures, Properties and In Silico Studies
Source: MDPI journal article supplement (doi:10.3390/ijms23031503), 2022-01-28
Supplement: s1 [file s1]

# Supplementary Materials

## Quaternary Selenides $\text{EuLnCuSe}_3$ : Synthesis, Structures, Properties and In Silico Studies

Maxim V. Grigoriev <sup>1</sup>, Leonid A. Solovyov <sup>2</sup>, Anna V. Ruseikina <sup>3,\*</sup>, Aleksandr S. Aleksandrovsky <sup>4,5</sup>, Vladimir A. Chernyshev <sup>6</sup>, Dmitriy A. Velikanov <sup>5</sup>, Alexander A. Garmonov <sup>7</sup>, Maxim S. Molokeev <sup>5,8,9</sup>, Aleksandr S. Oreshonkov <sup>5,10</sup>, Nikolay P. Shestakov <sup>5</sup>, Alexey V. Matigorov <sup>11</sup>, Svetlana S. Volkova <sup>3</sup>, Evgeniy A. Ostapchuk <sup>1</sup>, Alexander V. Kertman <sup>3</sup>, Thomas Schleid <sup>12</sup> and Damir A. Safin <sup>3,13,14,\*</sup>

- <sup>1</sup> Laboratory of Theory and Optimization of Chemical and Technological Processes, University of Tyumen, 625003 Tyumen, Russia; maxgrigmvv@yandex.ru (M.V.G.); ostapchuk\_evgeniy@list.ru (E.A.O.)
- <sup>2</sup> Institute of Chemistry and Chemical Technology, Federal Research Center KSC SB RAS, 660036 Krasnoyarsk, Russia; leosol@icct.ru
- <sup>3</sup> Institute of Chemistry, University of Tyumen, 625003 Tyumen, Russia; s.s.volkova@utmn.ru (S.S.V.); a.v.kertman@utmn.ru (A.V.K.)
- <sup>4</sup> Department of Photonics and Laser Technology, Siberian Federal University, 660079 Krasnoyarsk, Russia; aleksandrovsky@kirensky.ru (A.S.A.)
- <sup>5</sup> Kirensky Institute of Physics, Federal Research Center KSC SB RAS, 660036 Krasnoyarsk, Russia; dpona1@gmail.com (D.A.V.); msmolokeev@mail.ru (M.S.M.); oreshonkov@iph.krasn.ru (A.S.O.); nico@iph.krasn.ru (N.P.S.)
- <sup>6</sup> Institute of Natural Sciences and Mathematics, Ural Federal University named after the First President of Russia B.N. Yeltsin, Mira Str. 19, 620002 Ekaterinburg, Russia; vchern@inbox.ru
- <sup>7</sup> Institute of Physics and Technology, University of Tyumen, 625003 Tyumen, Russia; gamma125@mail.ru
- <sup>8</sup> Research and Development Department, Kemerovo State University, Kemerovo, 650000, Russia
- <sup>9</sup> Institute of Engineering Physics and Radioelectronics, Siberian Federal University, 660079 Krasnoyarsk, Russia
- <sup>10</sup> School of Engineering and Construction, Siberian Federal University, Krasnoyarsk 660041, Russia;
- <sup>11</sup> Engineering Centre of Composite Materials Based on Wolfram Compounds and Rare-Earth Elements, University of Tyumen, 625003 Tyumen, Russia; a.v.matigorov@utmn.ru
- <sup>12</sup> Institute of Inorganic Chemistry, University of Stuttgart, D-70569 Stuttgart, Germany; thomas.schleid@iac.uni-stuttgart.de
- <sup>13</sup> «Advanced Materials for Industry and Biomedicine» Laboratory, Kurgan State University, Sovetskaya Str. 63/4, 640020 Kurgan, Russia
- <sup>14</sup> Innovation Center for Chemical and Pharmaceutical Technologies, Ural Federal University named after the First President of Russia B.N. Yeltsin, Mira Str. 19, 620002 Ekaterinburg, Russia
- \* Correspondence: a.v.ruseikina@utmn.ru (A.V.R.); damir.a.safin@gmail.com (D.A.S.)

**Table S1.** Structural types and space groups of the selenides  $ALnCuSe_3$ .<sup>1</sup>

| La                                                                                    | Ce   | Pr   | Nd   | Sm   | Eu   | Gd          | Tb   | Dy   | Ho          | Y       | Er          | Tm   | Yb   | Lu   | Sc      |
|---------------------------------------------------------------------------------------|------|------|------|------|------|-------------|------|------|-------------|---------|-------------|------|------|------|---------|
| <i>EuLnCuSe<sub>3</sub></i>                                                           |      |      |      |      |      |             |      |      |             |         |             |      |      |      |         |
| <i>Pnma</i>                                                                           |      |      |      |      |      |             |      |      |             |         | <i>Cmcm</i> |      |      |      |         |
| 2                                                                                     |      |      |      | 2    | [31] | 2           | 2    | 2    | 2           | 2       | [60]        | 2    | 2    | 2    |         |
| <i>SrLnCuSe<sub>3</sub></i>                                                           |      |      |      |      |      |             |      |      |             |         |             |      |      |      |         |
| <i>Pnma</i>                                                                           |      |      |      |      |      |             |      |      | <i>Cmcm</i> |         |             |      |      |      |         |
| [26]                                                                                  | [27] | [27] | [42] | [42] |      | [26]        | [42] | [42] | [42]        | [28,42] | [42]        | [42] | [42] | [26] | [36,42] |
| <i>PbLnCuSe<sub>3</sub></i>                                                           |      |      |      |      |      |             |      |      |             |         |             |      |      |      |         |
| <i>Pnma</i>                                                                           |      |      |      |      |      |             |      |      |             |         |             |      |      |      |         |
| [37,39] [37,39,40] [37,39,40] [37–39] [33,39] [37–39] [37,39,41] [1,37,39] [37,39,41] |      |      |      |      |      |             |      |      |             |         |             |      |      |      |         |
| <i>BaLnCuSe<sub>3</sub></i>                                                           |      |      |      |      |      |             |      |      |             |         |             |      |      |      |         |
| <i>Pnma</i>                                                                           |      |      |      |      |      | <i>Cmcm</i> |      |      |             |         |             |      |      |      |         |
| [30]                                                                                  | [30] |      |      |      |      | [3]         |      |      |             | [28,30] | [30]        |      |      |      |         |
| [25]                                                                                  |      |      |      |      |      |             |      |      |             |         |             |      |      |      |         |

<sup>1</sup> Color code: yellow = *Pnma* space group; green = *Cmcm* space group; pink =  $Ba_2MnS_3$  structural type [22]; blue =  $Eu_2CuS_3$  structural type [43]; orange =  $KZrCuS_3$  structural type [23]; grey =  $\beta$ - $BaLaCuSe_3$  structural type [30]; cyan =  $BaLaCuS_3$  structural type [25].

<sup>2</sup> This work.

**Table S2.** Fractional atomic coordinates of EuLnCuSe<sub>3</sub>.

| Atom                  | <i>x</i>  | <i>y</i>    | <i>z</i>    | Atom                  | <i>x</i>    | <i>y</i>    | <i>z</i>    | Atom                  | <i>x</i>    | <i>y</i>    | <i>z</i>    |
|-----------------------|-----------|-------------|-------------|-----------------------|-------------|-------------|-------------|-----------------------|-------------|-------------|-------------|
| EuLaCuSe <sub>3</sub> |           |             |             | EuSmCuSe <sub>3</sub> |             |             |             | EuGdCuSe <sub>3</sub> |             |             |             |
| Eu                    | 0.0916(3) | 1/4         | 0.78634(12) | Eu                    | 0.27628(13) | 1/4         | 0.00032(9)  | Eu                    | 0.27194(16) | 1/4         | 0.00035(10) |
| La                    | 0.2564(3) | 1/4         | 0.03728(11) | Sm                    | 0.51584(12) | 1/4         | 0.25937(10) | Gd                    | 0.51465(16) | 1/4         | 0.25684(14) |
| Cu                    | 0.1207(5) | 1/4         | 0.3666(3)   | Cu                    | 0.2370(3)   | 1/4         | 0.7221(2)   | Cu                    | 0.2381(4)   | 1/4         | 0.7222(2)   |
| Se1                   | 0.1805(4) | 1/4         | 0.2202(2)   | Se1                   | 0.2609(2)   | 1/4         | 0.33001(14) | Se1                   | 0.2605(2)   | 1/4         | 0.32977(15) |
| Se2                   | 0.3852(4) | 1/4         | 0.4291(2)   | Se2                   | 0.4091(2)   | 1/4         | 0.60224(16) | Se2                   | 0.4146(2)   | 1/4         | 0.6038(2)   |
| Se3                   | 0.0130(4) | 1/4         | 0.60118(19) | Se3                   | 0.05134(18) | 1/4         | 0.61368(15) | Se3                   | 0.0520(2)   | 1/4         | 0.6139(2)   |
| EuTbCuSe <sub>3</sub> |           |             |             | EuDyCuSe <sub>3</sub> |             |             |             | EuHoCuSe <sub>3</sub> |             |             |             |
| Eu                    | 0.2679(2) | 1/4         | 0.00090(13) | Eu                    | 0.2650(2)   | 1/4         | 0.00105(11) | Eu                    | 0.2571(3)   | 1/4         | 0.00103(9)  |
| Tb                    | 0.5125(2) | 1/4         | 0.25561(18) | Dy                    | 0.5113(2)   | 1/4         | 0.2545(2)   | Ho                    | 0.5070(3)   | 1/4         | 0.2521(3)   |
| Cu                    | 0.2389(5) | 1/4         | 0.7226(3)   | Cu                    | 0.2414(5)   | 1/4         | 0.7213(2)   | Cu                    | 0.2439(6)   | 1/4         | 0.72130(18) |
| Se1                   | 0.2598(3) | 1/4         | 0.32966(19) | Se1                   | 0.2576(3)   | 1/4         | 0.32942(17) | Se1                   | 0.2555(4)   | 1/4         | 0.32908(15) |
| Se2                   | 0.4189(3) | 1/4         | 0.6057(3)   | Se2                   | 0.4223(3)   | 1/4         | 0.6062(3)   | Se2                   | 0.4287(4)   | 1/4         | 0.6083(4)   |
| Se3                   | 0.0532(2) | 1/4         | 0.6124(2)   | Se3                   | 0.0544(3)   | 1/4         | 0.6121(2)   | Se3                   | 0.0590(3)   | 1/4         | 0.6100(4)   |
| EuYCuSe <sub>3</sub>  |           |             |             | EuTmCuSe <sub>3</sub> |             |             |             | EuYbCuSe <sub>3</sub> |             |             |             |
| Eu                    | 0.2637(3) | 1/4         | 0.00084(18) | Eu                    | 0           | 0.75115(8)  | 0.25        | Eu                    | 0           | 0.75123(8)  | 1/4         |
| Y                     | 0.5089(4) | 1/4         | 0.2537(4)   | Tm                    | 0           | 0           | 0           | Yb                    | 0           | 0           | 0           |
| Cu                    | 0.2421(7) | 1/4         | 0.7213(3)   | Cu                    | 0           | 0.47090(18) | 0.25        | Cu                    | 0           | 0.47062(18) | 1/4         |
| Se1                   | 0.2581(4) | 1/4         | 0.3297(2)   | Se1                   | 0           | 0.36007(9)  | 0.06277(12) | Se1                   | 0           | 0.36031(10) | 0.06196(11) |
| Se2                   | 0.4240(4) | 1/4         | 0.6075(4)   | Se2                   | 0           | 0.07871(14) | 0.25        | Se2                   | 0           | 0.07812(15) | 1/4         |
| Se3                   | 0.0545(4) | 1/4         | 0.6119(4)   |                       |             |             |             |                       |             |             |             |
| EuLuCuSe <sub>3</sub> |           |             |             |                       |             |             |             |                       |             |             |             |
| Eu                    | 0         | 0.75130(9)  | 1/4         |                       |             |             |             |                       |             |             |             |
| Lu                    | 0         | 0           | 0           |                       |             |             |             |                       |             |             |             |
| Cu                    | 0         | 0.47055(19) | 1/4         |                       |             |             |             |                       |             |             |             |
| Se1                   | 0         | 0.36046(12) | 0.06177(13) |                       |             |             |             |                       |             |             |             |
| Se2                   | 0         | 0.07798(16) | 1/4         |                       |             |             |             |                       |             |             |             |

**Table S3.** Anisotropic displacement parameters ( $\text{\AA}^2$ ) of  $\text{EuLnCuSe}_3$ .

| Atom                  | $U_{11}$   | $U_{22}$   | $U_{33}$   | $U_{12}$ | $U_{13}$    | $U_{23}$   |
|-----------------------|------------|------------|------------|----------|-------------|------------|
| EuLaCuSe <sub>3</sub> |            |            |            |          |             |            |
| Eu                    | 0.0104(18) | 0.0085(16) | 0.0092(16) | 0.00000  | 0.0003(10)  | 0.00000    |
| La                    | 0.0149(16) | 0.0123(18) | 0.0118(16) | 0.00000  | −0.0034(11) | 0.00000    |
| Cu                    | 0.019(4)   | 0.024(4)   | 0.024(4)   | 0.00000  | 0.003(3)    | 0.00000    |
| Se1                   | 0.018(3)   | 0.012(3)   | 0.013(2)   | 0.00000  | 0.0019(19)  | 0.00000    |
| Se2                   | 0.011(2)   | 0.014(3)   | 0.012(2)   | 0.00000  | −0.0001(16) | 0.00000    |
| Se3                   | 0.013(3)   | 0.011(3)   | 0.019(3)   | 0.00000  | 0.0025(15)  | 0.00000    |
| EuSmCuSe <sub>3</sub> |            |            |            |          |             |            |
| Eu                    | 0.0241(17) | 0.0127(18) | 0.0155(16) | 0.00000  | 0.0000(9)   | 0.00000    |
| Sm                    | 0.0119(16) | 0.0101(17) | 0.0143(16) | 0.00000  | 0.0003(6)   | 0.00000    |
| Cu                    | 0.020(2)   | 0.029(3)   | 0.021(2)   | 0.00000  | 0.0022(17)  | 0.00000    |
| Se1                   | 0.010(2)   | 0.017(2)   | 0.0134(18) | 0.00000  | −0.0002(12) | 0.00000    |
| Se2                   | 0.020(2)   | 0.013(2)   | 0.010(2)   | 0.00000  | 0.0013(11)  | 0.00000    |
| Se3                   | 0.013(2)   | 0.015(2)   | 0.012(2)   | 0.00000  | 0.0009(12)  | 0.00000    |
| EuGdCuSe <sub>3</sub> |            |            |            |          |             |            |
| Eu                    | 0.0274(19) | 0.0175(16) | 0.0158(16) | 0.00000  | −0.0008(11) | 0.00000    |
| Gd                    | 0.0119(16) | 0.0129(16) | 0.0175(15) | 0.00000  | 0.0008(7)   | 0.00000    |
| Cu                    | 0.022(2)   | 0.022(3)   | 0.025(2)   | 0.00000  | −0.001(2)   | 0.00000    |
| Se1                   | 0.017(2)   | 0.0174(18) | 0.0096(19) | 0.00000  | −0.0021(16) | 0.00000    |
| Se2                   | 0.016(2)   | 0.015(2)   | 0.017(2)   | 0.00000  | 0.0023(14)  | 0.00000    |
| Se3                   | 0.013(2)   | 0.018(2)   | 0.011(2)   | 0.00000  | 0.0007(15)  | 0.00000    |
| EuTbCuSe <sub>3</sub> |            |            |            |          |             |            |
| Eu                    | 0.033(2)   | 0.0179(16) | 0.0179(14) | 0.00000  | 0.0029(15)  | 0.00000    |
| Tb                    | 0.0148(19) | 0.0182(16) | 0.0165(15) | 0.00000  | 0.0003(10)  | 0.00000    |
| Cu                    | 0.021(3)   | 0.028(3)   | 0.022(3)   | 0.00000  | −0.008(3)   | 0.00000    |
| Se1                   | 0.012(2)   | 0.0196(19) | 0.0168(18) | 0.00000  | 0.0035(19)  | 0.00000    |
| Se2                   | 0.018(2)   | 0.018(3)   | 0.019(3)   | 0.00000  | −0.0010(19) | 0.00000    |
| Se3                   | 0.012(2)   | 0.016(3)   | 0.017(3)   | 0.00000  | −0.0035(18) | 0.00000    |
| EuDyCuSe <sub>3</sub> |            |            |            |          |             |            |
| Eu                    | 0.0346(18) | 0.0148(13) | 0.0209(12) | 0.00000  | 0.0005(13)  | 0.00000    |
| Dy                    | 0.0121(14) | 0.0117(12) | 0.0172(12) | 0.00000  | 0.0015(9)   | 0.00000    |
| Cu                    | 0.027(2)   | 0.021(2)   | 0.021(2)   | 0.00000  | −0.003(3)   | 0.00000    |
| Se1                   | 0.0127(18) | 0.0175(16) | 0.0169(15) | 0.00000  | 0.0016(19)  | 0.00000    |
| Se2                   | 0.018(2)   | 0.020(3)   | 0.020(3)   | 0.00000  | 0.0014(15)  | 0.00000    |
| Se3                   | 0.018(2)   | 0.012(3)   | 0.018(3)   | 0.00000  | 0.0001(17)  | 0.00000    |
| EuHoCuSe <sub>3</sub> |            |            |            |          |             |            |
| Eu                    | 0.0379(14) | 0.0118(11) | 0.0187(9)  | 0.00000  | 0.000(2)    | 0.00000    |
| Ho                    | 0.0178(13) | 0.0168(12) | 0.0199(11) | 0.00000  | 0.0008(9)   | 0.00000    |
| Cu                    | 0.019(2)   | 0.023(2)   | 0.025(2)   | 0.00000  | −0.002(4)   | 0.00000    |
| Se1                   | 0.0148(15) | 0.0154(15) | 0.0171(13) | 0.00000  | 0.003(3)    | 0.00000    |
| Se2                   | 0.020(2)   | 0.013(4)   | 0.021(3)   | 0.00000  | 0.000(2)    | 0.00000    |
| Se3                   | 0.016(2)   | 0.015(4)   | 0.012(3)   | 0.00000  | −0.0032(19) | 0.00000    |
| EuYCuSe <sub>3</sub>  |            |            |            |          |             |            |
| Eu                    | 0.032(2)   | 0.0153(16) | 0.0261(15) | 0.00000  | −0.0015(19) | 0.00000    |
| Y                     | 0.0144(19) | 0.016(2)   | 0.0201(19) | 0.00000  | 0.0000(13)  | 0.00000    |
| Cu                    | 0.027(3)   | 0.022(2)   | 0.028(3)   | 0.00000  | −0.005(2)   | 0.00000    |
| Se1                   | 0.016(2)   | 0.0160(19) | 0.021(2)   | 0.00000  | −0.003(3)   | 0.00000    |
| Se2                   | 0.022(3)   | 0.015(3)   | 0.024(4)   | 0.00000  | −0.0026(18) | 0.00000    |
| Se3                   | 0.022(3)   | 0.016(3)   | 0.020(4)   | 0.00000  | −0.001(2)   | 0.00000    |
| EuTmCuSe <sub>3</sub> |            |            |            |          |             |            |
| Eu                    | 0.0150(12) | 0.0169(12) | 0.0324(15) | 0.00000  | 0.00000     | 0.00000    |
| Tm                    | 0.0131(11) | 0.0161(11) | 0.0160(11) | 0.00000  | 0.00000     | 0.0003(6)  |
| Cu                    | 0.026(2)   | 0.017(2)   | 0.0193(18) | 0.00000  | 0.00000     | 0.00000    |
| Se1                   | 0.0153(13) | 0.0138(11) | 0.0168(12) | 0.00000  | 0.00000     | −0.0003(7) |
| Se2                   | 0.0151(16) | 0.0136(14) | 0.0134(14) | 0.00000  | 0.00000     | 0.00000    |
| EuYbCuSe <sub>3</sub> |            |            |            |          |             |            |
| Yb                    | 0.0138(9)  | 0.0157(9)  | 0.0146(8)  | 0.00000  | 0.00000     | 0.0001(6)  |
| Eu                    | 0.0151(10) | 0.0157(10) | 0.0285(13) | 0.00000  | 0.00000     | 0.00000    |
| Cu                    | 0.0210(18) | 0.0206(18) | 0.0212(17) | 0.00000  | 0.00000     | 0.00000    |
| Se1                   | 0.0154(10) | 0.0143(11) | 0.0168(10) | 0.00000  | 0.00000     | −0.0004(7) |

|     |            |            |                       |         |         |           |
|-----|------------|------------|-----------------------|---------|---------|-----------|
| Se2 | 0.0147(14) | 0.0155(13) | 0.0127(11)            | 0.00000 | 0.00000 | 0.00000   |
|     |            |            | EuLuCuSe <sub>3</sub> |         |         |           |
| Eu  | 0.0126(10) | 0.0172(9)  | 0.0264(10)            | 0.00000 | 0.00000 | 0.00000   |
| Lu  | 0.0127(8)  | 0.0153(8)  | 0.0133(8)             | 0.00000 | 0.00000 | 0.0009(5) |
| Cu  | 0.018(2)   | 0.0207(18) | 0.0192(16)            | 0.00000 | 0.00000 | 0.00000   |
| Se1 | 0.0133(10) | 0.0139(10) | 0.0157(10)            | 0.00000 | 0.00000 | 0.0004(6) |
| Se2 | 0.0125(15) | 0.0154(12) | 0.0133(11)            | 0.00000 | 0.00000 | 0.00000   |

---

**Table S4.** Bond lengths (Å) in the structures of EuLnCuSe<sub>3</sub>.

| EuLaCuSe <sub>3</sub> <sup>1</sup> |                |                      |                |                      |                |
|------------------------------------|----------------|----------------------|----------------|----------------------|----------------|
| La–Se1                             | 3.115(4)       | Eu–Se1 <sup>i</sup>  | 2 × 3.062(3)   | Cu–Se1               | 2.492(6)       |
| La–Se2 <sup>iii</sup>              | 2 × 3.021(3)   | Eu–Se1 <sup>ii</sup> | 2 × 3.123(3)   | Cu–Se2               | 2.469(6)       |
| La–Se2 <sup>iv</sup>               | 3.193(5)       | Eu–Se2 <sup>i</sup>  | 2 × 3.184(3)   | Cu–Se3 <sup>ii</sup> | 2 × 2.451(3)   |
| La–Se3 <sup>iii</sup>              | 2 × 3.063(3)   | Eu–Se3               | 3.156(4)       |                      |                |
| La–Se3 <sup>v</sup>                | 3.169(4)       |                      |                |                      |                |
| EuSmCuSe <sub>3</sub> <sup>2</sup> |                |                      |                |                      |                |
| Sm–Se1                             | 2.902(3)       | Eu–Se1 <sup>i</sup>  | 2 × 3.0965(17) | Cu–Se1 <sup>iv</sup> | 2 × 2.5138(18) |
| Sm–Se1 <sup>ii</sup>               | 2.896(3)       | Eu–Se2 <sup>i</sup>  | 2 × 3.174(2)   | Cu–Se2               | 2.450(4)       |
| Sm–Se2 <sup>iii</sup>              | 2 × 2.8836(18) | Eu–Se3 <sup>i</sup>  | 2 × 3.1585(18) | Cu–Se3               | 2.469(4)       |
| Sm–Se3 <sup>i</sup>                | 2 × 2.9252(17) | Eu–Se3 <sup>ii</sup> | 3.331(2)       |                      |                |
| EuGdCuSe <sub>3</sub> <sup>2</sup> |                |                      |                |                      |                |
| Gd–Se1                             | 2.884(3)       | Eu–Se1 <sup>i</sup>  | 2 × 3.089(2)   | Cu–Se1 <sup>iv</sup> | 2 × 2.505(2)   |
| Gd–Se1 <sup>ii</sup>               | 2.869(3)       | Eu–Se2 <sup>i</sup>  | 2 × 3.175(2)   | Cu–Se2               | 2.463(4)       |
| Gd–Se2 <sup>iii</sup>              | 2 × 2.873(3)   | Eu–Se3 <sup>i</sup>  | 2 × 3.169(2)   | Cu–Se3               | 2.461(4)       |
| Gd–Se3 <sup>i</sup>                | 2 × 2.893(2)   | Eu–Se3 <sup>ii</sup> | 3.359(3)       |                      |                |
| EuTbCuSe <sub>3</sub> <sup>2</sup> |                |                      |                |                      |                |
| Tb–Se1                             | 2.857(4)       | Eu–Se1 <sup>i</sup>  | 2 × 3.085(2)   | Cu–Se1 <sup>iv</sup> | 2 × 2.495 (2)  |
| Tb–Se1 <sup>ii</sup>               | 2.860(4)       | Eu–Se2 <sup>i</sup>  | 2 × 3.172(3)   | Cu–Se2               | 2.469 (6)      |
| Tb–Se2 <sup>iii</sup>              | 2 × 2.854(3)   | Eu–Se3 <sup>i</sup>  | 2 × 3.163(3)   | Cu–Se3               | 2.462 (5)      |
| Tb–Se3 <sup>i</sup>                | 2 × 2.887(3)   | Eu–Se3 <sup>ii</sup> | 3.384(3)       |                      |                |
| EuDyCuSe <sub>3</sub> <sup>2</sup> |                |                      |                |                      |                |
| Dy–Se1                             | 2.862(4)       | Eu–Se1 <sup>i</sup>  | 2 × 3.081(2)   | Cu–Se1 <sup>iv</sup> | 2 × 2.500(2)   |
| Dy–Se1 <sup>ii</sup>               | 2.834(4)       | Eu–Se2 <sup>i</sup>  | 2 × 3.171(3)   | Cu–Se2               | 2.455(6)       |
| Dy–Se2 <sup>iii</sup>              | 2 × 2.851(3)   | Eu–Se3 <sup>i</sup>  | 2 × 3.163(3)   | Cu–Se3               | 2.458(5)       |
| Dy–Se3 <sup>i</sup>                | 2 × 2.876(3)   | Eu–Se3 <sup>ii</sup> | 3.412(4)       |                      |                |
| EuHoCuSe <sub>3</sub> <sup>2</sup> |                |                      |                |                      |                |
| Ho–Se1                             | 2.839(6)       | Eu–Se1 <sup>i</sup>  | 2 × 3.076(2)   | Cu–Se1 <sup>iv</sup> | 2 × 2.495(2)   |
| Ho–Se1 <sup>ii</sup>               | 2.831(6)       | Eu–Se2 <sup>i</sup>  | 2 × 3.166(4)   | Cu–Se2               | 2.463(7)       |
| Ho–Se2 <sup>iii</sup>              | 2 × 2.845(5)   | Eu–Se3 <sup>i</sup>  | 2 × 3.165(4)   | Cu–Se3               | 2.450(6)       |
| Ho–Se3 <sup>i</sup>                | 2 × 2.872(5)   | Eu–Se3 <sup>ii</sup> | 3.507(5)       |                      |                |
| EuYCuSe <sub>3</sub> <sup>2</sup>  |                |                      |                |                      |                |
| Y–Se1                              | 2.839(6)       | Eu–Se1 <sup>i</sup>  | 2 × 3.078(3)   | Cu–Se1 <sup>iv</sup> | 2 × 2.504(3)   |
| Y–Se1 <sup>ii</sup>                | 2.860(6)       | Eu–Se2 <sup>i</sup>  | 2 × 3.184(4)   | Cu–Se2               | 2.453(8)       |
| Y–Se2 <sup>iii</sup>               | 2 × 2.850(5)   | Eu–Se3 <sup>i</sup>  | 2 × 3.172(4)   | Cu–Se3               | 2.465(8)       |
| Y–Se3 <sup>i</sup>                 | 2 × 2.868(5)   | Eu–Se3 <sup>ii</sup> | 3.424(5)       |                      |                |
| EuTmCuSe <sub>3</sub> <sup>3</sup> |                |                      |                |                      |                |
| Tm–Se1 <sup>i</sup>                | 4 × 2.8372(9)  | Eu–Se1 <sup>ii</sup> | 4 × 3.1725(11) | Cu–Se1               | 2 × 2.4547(19) |
| Tm–Se2                             | 2 × 2.8162(7)  | Eu–Se2 <sup>ii</sup> | 2 × 3.0720(16) | Cu–Se2 <sup>ii</sup> | 2 × 2.4891(17) |
|                                    |                | Eu...Se1             | 2 × 3.5905(13) |                      |                |
| EuYbCuSe <sub>3</sub> <sup>3</sup> |                |                      |                |                      |                |
| Yb–Se1 <sup>i</sup>                | 4 × 2.8289(9)  | Eu–Se1 <sup>ii</sup> | 4 × 3.1716(11) | Cu–Se1               | 2 × 2.4512(19) |
| Yb–Se2                             | 2 × 2.8048(7)  | Eu–Se2 <sup>ii</sup> | 2 × 3.0749(17) | Cu–Se2 <sup>ii</sup> | 2 × 2.4829(18) |
|                                    |                | Eu...Se1             | 2 × 3.5742(13) |                      |                |
| EuLuCuSe <sub>3</sub> <sup>3</sup> |                |                      |                |                      |                |
| Lu–Se1 <sup>i</sup>                | 4 × 2.8249(11) | Eu–Se1 <sup>ii</sup> | 4 × 3.1695(13) | Cu–Se1               | 2 × 2.449(2)   |
| Lu–Se2                             | 2 × 2.8002(8)  | Eu–Se2 <sup>ii</sup> | 2 × 3.0751(19) | Cu–Se2 <sup>ii</sup> | 2 × 2.480(2)   |
|                                    |                | Eu...Se1             | 2 × 3.5688(15) |                      |                |

<sup>1</sup> Symmetry codes: (i)  $-x + 1/2, -y, z + 1/2$ ; (ii)  $-x, y - 1/2, -z + 1$ ; (iii)  $-x + 1/2, -y, z - 1/2$ ; (iv)  $x - 1/2, -y + 1/2, -z + 1/2$ ; (v)  $x + 1/2, -y + 1/2, -z + 1/2$ ; (vi)  $-x + 1/2, -y + 1, z + 1/2$ ; (vii)  $-x, y + 1/2, -z + 1$ ; (viii)  $-x + 1/2, -y + 1, z - 1/2$ .

<sup>2</sup> Symmetry codes: (i)  $-x + 1/2, -y, z - 1/2$ ; (ii)  $x + 1/2, -y + 1/2, -z + 1/2$ ; (iii)  $-x + 1, y - 1/2, -z + 1$ ; (iv)  $-x + 1/2, -y, z + 1/2$ ; (v)  $-x + 1/2, -y + 1, z - 1/2$ ; (vi)  $-x + 1, y + 1/2, -z + 1$ ; (vii)  $-x + 1/2, -y + 1, z + 1/2$ .

<sup>3</sup> Symmetry codes: (i)  $-1/2 + x, -1/2 + y, z$ ; (ii)  $-1/2 + x, 1/2 + y, z$ ; (iii)  $1/2 + x, -1/2 + y, z$ ; (iv)  $-1/2 + x, 1/2 - y, -z$ ; (v)  $-x, -y, -1/2 + z$ ; (vi)  $1/2 + x, 1/2 + y, z$ ; (vii)  $-1/2 - x, 1/2 + y, 1/2 - z$ ; (viii)  $1/2 - x, 1/2 + y, 1/2 - z$ ; (ix)  $-x, y, 1/2 - z$ .

**Table S5.** Bond angles (°) in the structures of EuLnCuSe<sub>3</sub>.

| EuLaCuSe <sub>3</sub> <sup>1</sup>         |            |                                          |            |                                          |            |
|--------------------------------------------|------------|------------------------------------------|------------|------------------------------------------|------------|
| Se1–La–Se2 <sup>iii</sup>                  | 120.13(9)  | Se1 <sup>i</sup> –Eu–Se1 <sup>vi</sup>   | 86.95(11)  | Se1–Cu–Se2                               | 103.2(2)   |
| Se1–La–Se2 <sup>iv</sup>                   | 67.98(10)  | Se1 <sup>i</sup> –Eu–Se1 <sup>ii</sup>   | 89.31(3)   | Se1–Cu–Se3 <sup>ii</sup>                 | 107.95(15) |
| Se1–La–Se3 <sup>iii</sup>                  | 77.96(9)   | Se1 <sup>i</sup> –Eu–Se1 <sup>vii</sup>  | 156.39(8)  | Se2–Cu–Se3 <sup>ii</sup>                 | 109.05(15) |
| Se1–La–Se3 <sup>v</sup>                    | 148.64(13) | Se1 <sup>i</sup> –Eu–Se2 <sup>i</sup>    | 76.97(8)   | Se3 <sup>ii</sup> –Cu–Se3 <sup>vii</sup> | 118.5(2)   |
| Se2 <sup>iii</sup> –La–Se2 <sup>viii</sup> | 88.45(11)  | Se1 <sup>i</sup> –Eu–Se2 <sup>vi</sup>   | 133.25(11) |                                          |            |
| Se2 <sup>iii</sup> –La–Se2 <sup>iv</sup>   | 73.38(10)  | Se1 <sup>i</sup> –Eu–Se3                 | 77.35(9)   |                                          |            |
| Se2 <sup>iii</sup> –La–Se3 <sup>iii</sup>  | 88.88(7)   | Se1 <sup>ii</sup> –Eu–Se1 <sup>vii</sup> | 84.85(10)  |                                          |            |
| Se2 <sup>iii</sup> –La–Se3 <sup>viii</sup> | 160.06(12) | Se1 <sup>ii</sup> –Eu–Se2 <sup>i</sup>   | 67.99(8)   |                                          |            |
| Se2 <sup>iii</sup> –La–Se3 <sup>v</sup>    | 80.65(9)   | Se1 <sup>ii</sup> –Eu–Se2 <sup>vi</sup>  | 121.21(11) |                                          |            |
| Se2 <sup>iv</sup> –La–Se3 <sup>iii</sup>   | 124.49(8)  | Se1 <sup>ii</sup> –Eu–Se3                | 79.08(9)   |                                          |            |
| Se2 <sup>iv</sup> –La–Se3 <sup>v</sup>     | 143.38(11) | Se2 <sup>i</sup> –Eu–Se2 <sup>vi</sup>   | 82.87(10)  |                                          |            |
| Se3 <sup>iii</sup> –La–Se3 <sup>viii</sup> | 86.92(11)  | Se2 <sup>i</sup> –Eu–Se3                 | 138.03(5)  |                                          |            |
| Se3 <sup>iii</sup> –La–Se3 <sup>v</sup>    | 79.41(9)   |                                          |            |                                          |            |
| EuSmCuSe <sub>3</sub> <sup>2</sup>         |            |                                          |            |                                          |            |
| Se1–Sm–Se1 <sup>ii</sup>                   | 174.62(6)  | Se1 <sup>i</sup> –Eu–Se1 <sup>v</sup>    | 83.25(5)   | Se1 <sup>iv</sup> –Cu–Se1 <sup>vii</sup> | 109.82(12) |
| Se1–Sm–Se2 <sup>iii</sup>                  | 93.19(7)   | Se1 <sup>i</sup> –Eu–Se2 <sup>i</sup>    | 78.74(5)   | Se1 <sup>iv</sup> –Cu–Se2                | 111.68(11) |
| Se1–Sm–Se3 <sup>i</sup>                    | 89.06(6)   | Se1 <sup>i</sup> –Eu–Se2 <sup>v</sup>    | 131.74(7)  | Se1 <sup>iv</sup> –Cu–Se3                | 110.18(11) |
| Se1 <sup>ii</sup> –Sm–Se2 <sup>iii</sup>   | 90.58(6)   | Se1 <sup>i</sup> –Eu–Se3 <sup>i</sup>    | 89.83(4)   | Se2–Cu–Se3                               | 103.13(12) |
| Se1 <sup>ii</sup> –Sm–Se3 <sup>i</sup>     | 87.12(6)   | Se1 <sup>i</sup> –Eu–Se3 <sup>v</sup>    | 149.57(7)  |                                          |            |
| Se2 <sup>iii</sup> –Sm–Se2 <sup>vi</sup>   | 91.01(7)   | Se1 <sup>i</sup> –Eu–Se3 <sup>ii</sup>   | 77.15(6)   |                                          |            |
| Se2 <sup>iii</sup> –Sm–Se3 <sup>i</sup>    | 89.77(4)   | Se2 <sup>i</sup> –Eu–Se2 <sup>v</sup>    | 80.79(7)   |                                          |            |
| Se2 <sup>iii</sup> –Sm–Se3 <sup>v</sup>    | 177.58(8)  | Se2 <sup>i</sup> –Eu–Se3 <sup>i</sup>    | 74.97(5)   |                                          |            |
| Se3 <sup>i</sup> –Sm–Se3 <sup>v</sup>      | 89.36(7)   | Se2 <sup>i</sup> –Eu–Se3 <sup>v</sup>    | 125.79(6)  |                                          |            |
|                                            |            | Se2 <sup>i</sup> –Eu–Se3 <sup>ii</sup>   | 139.09(4)  |                                          |            |
|                                            |            | Se3 <sup>i</sup> –Eu–Se3 <sup>v</sup>    | 81.27(6)   |                                          |            |
|                                            |            | Se3 <sup>i</sup> –Eu–Se3 <sup>ii</sup>   | 72.42(6)   |                                          |            |
| EuGdCuSe <sub>3</sub> <sup>2</sup>         |            |                                          |            |                                          |            |
| Se1–Gd–Se1 <sup>ii</sup>                   | 175.95(8)  | Se1 <sup>i</sup> –Eu–Se1 <sup>v</sup>    | 83.09(6)   | Se1 <sup>iv</sup> –Cu–Se1 <sup>vii</sup> | 109.73(13) |
| Se1–Gd–Se2 <sup>iii</sup>                  | 91.56(8)   | Se1 <sup>i</sup> –Eu–Se2 <sup>i</sup>    | 79.92(6)   | Se1 <sup>iv</sup> –Cu–Se2                | 111.49(12) |
| Se1–Gd–Se3 <sup>i</sup>                    | 89.60(7)   | Se1 <sup>i</sup> –Eu–Se2 <sup>v</sup>    | 132.89(9)  | Se1 <sup>iv</sup> –Cu–Se3                | 110.14(12) |
| Se1 <sup>ii</sup> –Gd–Se2 <sup>iii</sup>   | 91.28(7)   | Se1 <sup>i</sup> –Eu–Se3 <sup>i</sup>    | 89.60(5)   | Se2–Cu–Se3                               | 103.73(14) |
| Se1 <sup>ii</sup> –Gd–Se3 <sup>i</sup>     | 87.54(7)   | Se1 <sup>i</sup> –Eu–Se3 <sup>v</sup>    | 148.25(8)  |                                          |            |
| Se2 <sup>iii</sup> –Gd–Se2 <sup>vi</sup>   | 90.95(11)  | Se1 <sup>i</sup> –Eu–Se3 <sup>ii</sup>   | 76.26(6)   |                                          |            |
| Se2 <sup>iii</sup> –Gd–Se3 <sup>i</sup>    | 89.45(6)   | Se2 <sup>i</sup> –Eu–Se2 <sup>v</sup>    | 80.35(8)   |                                          |            |
| Se2 <sup>iii</sup> –Gd–Se3 <sup>v</sup>    | 178.77(10) | Se2 <sup>i</sup> –Eu–Se3 <sup>i</sup>    | 75.24(6)   |                                          |            |
| Se3 <sup>i</sup> –Gd–Se3 <sup>v</sup>      | 90.13(9)   | Se2 <sup>i</sup> –Eu–Se3 <sup>v</sup>    | 125.41(8)  |                                          |            |
|                                            |            | Se2 <sup>i</sup> –Eu–Se3 <sup>ii</sup>   | 139.21(4)  |                                          |            |
|                                            |            | Se3 <sup>i</sup> –Eu–Se3 <sup>v</sup>    | 80.54(7)   |                                          |            |
|                                            |            | Se3 <sup>i</sup> –Eu–Se3 <sup>ii</sup>   | 71.99(7)   |                                          |            |
| EuTbCuSe <sub>3</sub> <sup>2</sup>         |            |                                          |            |                                          |            |
| Se1–Tb–Se1 <sup>ii</sup>                   | 176.78(11) | Se1 <sup>i</sup> –Eu–Se1 <sup>v</sup>    | 82.91(7)   | Se1 <sup>iv</sup> –Cu–Se1 <sup>vii</sup> | 109.88(16) |
| Se1–Tb–Se2 <sup>iii</sup>                  | 90.75(9)   | Se1 <sup>i</sup> –Eu–Se2 <sup>i</sup>    | 81.00(8)   | Se1 <sup>iv</sup> –Cu–Se2                | 111.11(16) |
| Se1–Tb–Se3 <sup>i</sup>                    | 90.26(9)   | Se1 <sup>i</sup> –Eu–Se2 <sup>v</sup>    | 134.10(11) | Se1 <sup>iv</sup> –Cu–Se3                | 110.42(16) |
| Se1 <sup>ii</sup> –Tb–Se2 <sup>iii</sup>   | 91.50(9)   | Se1 <sup>i</sup> –Eu–Se3 <sup>i</sup>    | 88.89(7)   | Se2–Cu–Se3                               | 103.78(17) |
| Se1 <sup>ii</sup> –Tb–Se3 <sup>i</sup>     | 87.46(9)   | Se1 <sup>i</sup> –Eu–Se3 <sup>v</sup>    | 146.67(11) |                                          |            |
| Se2 <sup>iii</sup> –Tb–Se2 <sup>vi</sup>   | 91.36(12)  | Se1 <sup>i</sup> –Eu–Se3 <sup>ii</sup>   | 75.62(8)   |                                          |            |
| Se2 <sup>iii</sup> –Tb–Se3 <sup>i</sup>    | 89.29(7)   | Se2 <sup>i</sup> –Eu–Se2 <sup>v</sup>    | 80.14(9)   |                                          |            |
| Se2 <sup>iii</sup> –Tb–Se3 <sup>v</sup>    | 178.79(12) | Se2 <sup>i</sup> –Eu–Se3 <sup>i</sup>    | 75.52(7)   |                                          |            |
| Se3 <sup>i</sup> –Tb–Se3 <sup>v</sup>      | 90.05(11)  | Se2 <sup>i</sup> –Eu–Se3 <sup>v</sup>    | 125.54(10) |                                          |            |
|                                            |            | Se2 <sup>i</sup> –Eu–Se3 <sup>ii</sup>   | 139.15(5)  |                                          |            |
|                                            |            | Se3 <sup>i</sup> –Eu–Se3 <sup>v</sup>    | 80.44(8)   |                                          |            |
|                                            |            | Se3 <sup>i</sup> –Eu–Se3 <sup>ii</sup>   | 71.06(9)   |                                          |            |
| EuDyCuSe <sub>3</sub> <sup>2</sup>         |            |                                          |            |                                          |            |
| Se1–Dy–Se1 <sup>ii</sup>                   | 177.17(12) | Se1 <sup>i</sup> –Eu–Se1 <sup>v</sup>    | 82.83(7)   | Se1 <sup>iv</sup> –Cu–Se1 <sup>vii</sup> | 109.23(14) |
| Se1–Dy–Se2 <sup>iii</sup>                  | 90.05(10)  | Se1 <sup>i</sup> –Eu–Se2 <sup>i</sup>    | 81.81(8)   | Se1 <sup>iv</sup> –Cu–Se2                | 111.12(16) |
| Se1–Dy–Se3 <sup>i</sup>                    | 90.36(9)   | Se1 <sup>i</sup> –Eu–Se2 <sup>v</sup>    | 135.08(11) | Se1 <sup>iv</sup> –Cu–Se3                | 110.36(16) |
| Se1 <sup>ii</sup> –Dy–Se2 <sup>iii</sup>   | 91.93(9)   | Se1 <sup>i</sup> –Eu–Se3 <sup>i</sup>    | 88.35(7)   | Se2–Cu–Se3                               | 104.59(16) |
| Se1 <sup>ii</sup> –Dy–Se3 <sup>i</sup>     | 87.64(9)   | Se1 <sup>i</sup> –Eu–Se3 <sup>v</sup>    | 145.47(11) |                                          |            |
| Se2 <sup>iii</sup> –Dy–Se2 <sup>vi</sup>   | 91.29(13)  | Se1 <sup>i</sup> –Eu–Se3 <sup>ii</sup>   | 74.83(8)   |                                          |            |
| Se2 <sup>iii</sup> –Dy–Se3 <sup>i</sup>    | 89.22(7)   | Se2 <sup>i</sup> –Eu–Se2 <sup>v</sup>    | 80.01(9)   |                                          |            |

|                                          |            |                                           |            |                                          |            |
|------------------------------------------|------------|-------------------------------------------|------------|------------------------------------------|------------|
| Se2 <sup>iii</sup> –Dy–Se3 <sup>v</sup>  | 179.34(12) | Se2 <sup>i</sup> –Eu–Se3 <sup>i</sup>     | 75.70(7)   |                                          |            |
| Se3 <sup>i</sup> –Dy–Se3 <sup>v</sup>    | 90.26(12)  | Se2 <sup>i</sup> –Eu–Se3 <sup>v</sup>     | 125.58(10) |                                          |            |
|                                          |            | Se2 <sup>i</sup> –Eu–Se3 <sup>ii</sup>    | 139.15(5)  |                                          |            |
|                                          |            | Se3 <sup>i</sup> –Eu–Se3 <sup>v</sup>     | 80.26(9)   |                                          |            |
|                                          |            | Se3 <sup>i</sup> –Eu–Se3 <sup>ii</sup>    | 70.64(9)   |                                          |            |
|                                          |            | EuHoCuSe <sub>3</sub> <sup>2</sup>        |            |                                          |            |
| Se1–Ho–Se1 <sup>ii</sup>                 | 178.7(2)   | Se1 <sup>i</sup> –Eu–Se1 <sup>v</sup>     | 82.87(6)   | Se1 <sup>iv</sup> –Cu–Se1 <sup>vii</sup> | 109.33(12) |
| Se1–Ho–Se2 <sup>iii</sup>                | 89.02(14)  | Se1 <sup>i</sup> –Eu–Se2 <sup>i</sup>     | 83.55(11)  | Se1 <sup>iv</sup> –Cu–Se2                | 110.69(19) |
| Se1–Ho–Se3 <sup>i</sup>                  | 90.87(12)  | Se1 <sup>i</sup> –Eu–Se2 <sup>v</sup>     | 137.60(16) | Se1 <sup>iv</sup> –Cu–Se3                | 110.71(19) |
| Se1 <sup>ii</sup> –Ho–Se2 <sup>iii</sup> | 91.88(13)  | Se1 <sup>i</sup> –Eu–Se3 <sup>i</sup>     | 86.88(10)  | Se2–Cu–Se3                               | 104.64(18) |
| Se1 <sup>ii</sup> –Ho–Se3 <sup>i</sup>   | 88.21(13)  | Se1 <sup>i</sup> –Eu–Se3 <sup>v</sup>     | 142.84(16) |                                          |            |
| Se2 <sup>iii</sup> –Ho–Se2 <sup>vi</sup> | 91.4(2)    | Se1 <sup>i</sup> –Eu–Se3 <sup>ii</sup>    | 73.84(11)  |                                          |            |
| Se2 <sup>iii</sup> –Ho–Se3 <sup>i</sup>  | 89.18(10)  | Se2 <sup>i</sup> –Eu–Se2 <sup>v</sup>     | 80.02(12)  |                                          |            |
| Se2 <sup>iii</sup> –Ho–Se3 <sup>v</sup>  | 179.44(16) | Se2 <sup>i</sup> –Eu–Se3 <sup>i</sup>     | 75.79(9)   |                                          |            |
| Se3 <sup>i</sup> –Ho–Se3 <sup>v</sup>    | 90.27(19)  | Se2 <sup>i</sup> –Eu–Se3 <sup>v</sup>     | 125.57(13) |                                          |            |
|                                          |            | Se2 <sup>i</sup> –Eu–Se3 <sup>ii</sup>    | 138.70(7)  |                                          |            |
|                                          |            | Se3 <sup>i</sup> –Eu–Se3 <sup>v</sup>     | 80.07(12)  |                                          |            |
|                                          |            | Se3 <sup>i</sup> –Eu–Se3 <sup>ii</sup>    | 69.00(13)  |                                          |            |
|                                          |            | EuYCuSe <sub>3</sub> <sup>2</sup>         |            |                                          |            |
| Se1–Y–Se1 <sup>ii</sup>                  | 178.0(2)   | Se1 <sup>i</sup> –Eu–Se1 <sup>v</sup>     | 83.01(10)  | Se1 <sup>iv</sup> –Cu–Se1 <sup>vii</sup> | 109.1(2)   |
| Se1–Y–Se2 <sup>iii</sup>                 | 89.90(15)  | Se1 <sup>i</sup> –Eu–Se2 <sup>i</sup>     | 82.14(11)  | Se1 <sup>iv</sup> –Cu–Se2                | 111.2(2)   |
| Se1–Y–Se3 <sup>i</sup>                   | 91.12(14)  | Se1 <sup>i</sup> –Eu–Se2 <sup>v</sup>     | 135.43(15) | Se1 <sup>iv</sup> –Cu–Se3                | 110.1(2)   |
| Se1 <sup>ii</sup> –Y–Se2 <sup>iii</sup>  | 91.48(15)  | Se1 <sup>i</sup> –Eu–Se3 <sup>i</sup>     | 88.20(9)   | Se2–Cu–Se3                               | 105.1(2)   |
| Se1 <sup>ii</sup> –Y–Se3 <sup>i</sup>    | 87.49(14)  | Se1 <sup>i</sup> –Eu–Se3 <sup>v</sup>     | 145.19(14) |                                          |            |
| Se2 <sup>iii</sup> –Y–Se2 <sup>vi</sup>  | 91.4(2)    | Se1 <sup>i</sup> –Eu–Se3 <sup>ii</sup>    | 74.85(11)  |                                          |            |
| Se2 <sup>iii</sup> –Y–Se3 <sup>i</sup>   | 88.94(10)  | Se2 <sup>i</sup> –Eu–Se2 <sup>v</sup>     | 79.69(12)  |                                          |            |
| Se2 <sup>iii</sup> –Y–Se3 <sup>v</sup>   | 178.9(2)   | Se2 <sup>i</sup> –Eu–Se3 <sup>i</sup>     | 75.78(10)  |                                          |            |
| Se3 <sup>i</sup> –Y–Se3 <sup>v</sup>     | 90.69(19)  | Se2 <sup>i</sup> –Eu–Se3 <sup>v</sup>     | 125.34(14) |                                          |            |
|                                          |            | Se2 <sup>i</sup> –Eu–Se3 <sup>ii</sup>    | 139.20(6)  |                                          |            |
|                                          |            | Se3 <sup>i</sup> –Eu–Se3 <sup>v</sup>     | 80.05(11)  |                                          |            |
|                                          |            | Se3 <sup>i</sup> –Eu–Se3 <sup>ii</sup>    | 70.35(12)  |                                          |            |
|                                          |            | EuTmCuSe <sub>3</sub> <sup>3</sup>        |            |                                          |            |
| Se1 <sup>i</sup> –Tm–Se1 <sup>iii</sup>  | 91.28(4)   | Se1 <sup>ii</sup> –Eu–Se1 <sup>vi</sup>   | 79.50(3)   | Se1–Cu–Se1 <sup>ix</sup>                 | 105.67(11) |
| Se1 <sup>i</sup> –Tm–Se1 <sup>iv</sup>   | 88.71(4)   | Se1 <sup>ii</sup> –Eu–Se1 <sup>vii</sup>  | 76.14(4)   | Se1–Cu–Se2 <sup>ii</sup>                 | 110.49(2)  |
| Se1 <sup>i</sup> –Tm–Se2                 | 91.85(4)   | Se1 <sup>ii</sup> –Eu–Se1 <sup>viii</sup> | 125.32(5)  | Se2 <sup>ii</sup> –Cu–Se2 <sup>vi</sup>  | 109.18(11) |
| Se1 <sup>i</sup> –Tm–Se2 <sup>v</sup>    | 88.15(4)   | Se1 <sup>ii</sup> –Eu–Se2 <sup>ii</sup>   | 85.56(3)   |                                          |            |
|                                          |            | Se1 <sup>ii</sup> –Eu–Se2 <sup>vi</sup>   | 140.10(3)  |                                          |            |
|                                          |            | Se2 <sup>ii</sup> –Eu–Se2 <sup>vi</sup>   | 82.65(5)   |                                          |            |
|                                          |            | EuYbCuSe <sub>3</sub> <sup>3</sup>        |            |                                          |            |
| Se1 <sup>i</sup> –Yb–Se1 <sup>iii</sup>  | 91.39(4)   | Se1 <sup>ii</sup> –Eu–Se1 <sup>vi</sup>   | 79.33(3)   | Se1–Cu–Se1 <sup>ix</sup>                 | 106.02(11) |
| Se1 <sup>i</sup> –Yb–Se1 <sup>iv</sup>   | 88.61(4)   | Se1 <sup>ii</sup> –Eu–Se1 <sup>vii</sup>  | 76.24(4)   | Se1–Cu–Se2 <sup>ii</sup>                 | 110.38(2)  |
| Se1 <sup>i</sup> –Yb–Se2                 | 91.96(4)   | Se1 <sup>ii</sup> –Eu–Se1 <sup>viii</sup> | 125.25(6)  | Se2 <sup>ii</sup> –Cu–Se2 <sup>vi</sup>  | 109.25(12) |
| Se1 <sup>i</sup> –Yb–Se2 <sup>v</sup>    | 88.04(4)   | Se1 <sup>ii</sup> –Eu–Se2 <sup>ii</sup>   | 85.75(3)   |                                          |            |
|                                          |            | Se1 <sup>ii</sup> –Eu–Se2 <sup>vi</sup>   | 140.03(3)  |                                          |            |
|                                          |            | Se2 <sup>ii</sup> –Eu–Se2 <sup>vi</sup>   | 82.36(6)   |                                          |            |
|                                          |            | EuLuCuSe <sub>3</sub> <sup>3</sup>        |            |                                          |            |
| Se1 <sup>i</sup> –Lu–Se1 <sup>iii</sup>  | 91.40(4)   | Se1 <sup>ii</sup> –Eu–Se1 <sup>vi</sup>   | 79.26(4)   | Se1–Cu–Se1 <sup>ix</sup>                 | 106.10(12) |
| Se1 <sup>i</sup> –Lu–Se1 <sup>iv</sup>   | 88.60(4)   | Se1 <sup>ii</sup> –Eu–Se1 <sup>vii</sup>  | 76.25(5)   | Se1–Cu–Se2 <sup>ii</sup>                 | 110.37(3)  |
| Se1 <sup>i</sup> –Lu–Se2                 | 92.00(4)   | Se1 <sup>ii</sup> –Eu–Se1 <sup>viii</sup> | 125.17(7)  | Se2 <sup>ii</sup> –Cu–Se2 <sup>vi</sup>  | 109.22(13) |
| Se1 <sup>i</sup> –Lu–Se2 <sup>v</sup>    | 88.00(4)   | Se1 <sup>ii</sup> –Eu–Se2 <sup>ii</sup>   | 85.85(3)   |                                          |            |
|                                          |            | Se1 <sup>ii</sup> –Eu–Se2 <sup>vi</sup>   | 140.02(3)  |                                          |            |
|                                          |            | Se2 <sup>ii</sup> –Eu–Se2 <sup>vi</sup>   | 82.21(6)   |                                          |            |

<sup>1</sup> Symmetry codes: (i)  $-x + 1/2, -y, z + 1/2$ ; (ii)  $-x, y - 1/2, -z + 1$ ; (iii)  $-x + 1/2, -y, z - 1/2$ ; (iv)  $x - 1/2, -y + 1/2, -z + 1/2$ ; (v)  $x + 1/2, -y + 1/2, -z + 1/2$ ; (vi)  $-x + 1/2, -y + 1, z + 1/2$ ; (vii)  $-x, y + 1/2, -z + 1$ ; (viii)  $-x + 1/2, -y + 1, z - 1/2$ .

<sup>2</sup> Symmetry codes: (i)  $-x + 1/2, -y, z - 1/2$ ; (ii)  $x + 1/2, -y + 1/2, -z + 1/2$ ; (iii)  $-x + 1, y - 1/2, -z + 1$ ; (iv)  $-x + 1/2, -y, z + 1/2$ ; (v)  $-x + 1/2, -y + 1, z - 1/2$ ; (vi)  $-x + 1, y + 1/2, -z + 1$ ; (vii)  $-x + 1/2, -y + 1, z + 1/2$ .

<sup>3</sup> Symmetry codes: (i)  $-1/2 + x, -1/2 + y, z$ ; (ii)  $-1/2 + x, 1/2 + y, z$ ; (iii)  $1/2 + x, -1/2 + y, z$ ; (iv)  $-1/2 + x, 1/2 - y, -z$ ; (v)  $-x, -y, -1/2 + z$ ; (vi)  $1/2 + x, 1/2 + y, z$ ; (vii)  $-1/2 - x, 1/2 + y, 1/2 - z$ ; (viii)  $1/2 - x, 1/2 + y, 1/2 - z$ ; (ix)  $-x, y, 1/2 - z$ .



**Table S6.** The unit cell parameters for the structures of EuLnCuSe<sub>3</sub>.

| Compound              | Space group | Structural type                  | <i>a</i> (Å) | <i>b</i> (Å) | <i>c</i> (Å) | <i>V</i> (Å <sup>3</sup> ) | <i>a/c</i> |
|-----------------------|-------------|----------------------------------|--------------|--------------|--------------|----------------------------|------------|
| EuLaCuSe <sub>3</sub> | <i>Pnma</i> | Ba <sub>2</sub> MnS <sub>3</sub> | 8.4389       | 4.2666       | 16.5676      | 596.52                     | 0.5094     |
| EuCeCuSe <sub>3</sub> | <i>Pnma</i> | Ba <sub>2</sub> MnS <sub>3</sub> | 8.4217       | 4.2574       | 16.4995      | 591.58                     | 0.5104     |
| EuPrCuSe <sub>3</sub> | <i>Pnma</i> | Eu <sub>2</sub> CuS <sub>3</sub> | 10.9503      | 4.1515       | 13.3802      | 608.27                     | 0.8184     |
| EuNdCuSe <sub>3</sub> | <i>Pnma</i> | Eu <sub>2</sub> CuS <sub>3</sub> | 10.8737      | 4.1394       | 13.4061      | 603.42                     | 0.8111     |
| EuSmCuSe <sub>3</sub> | <i>Pnma</i> | Eu <sub>2</sub> CuS <sub>3</sub> | 10.7522      | 4.1198       | 13.4212      | 594.52                     | 0.8011     |
| EuGdCuSe <sub>3</sub> | <i>Pnma</i> | Eu <sub>2</sub> CuS <sub>3</sub> | 10.6521      | 4.1012       | 13.4213      | 586.33                     | 0.7937     |
| EuTbCuSe <sub>3</sub> | <i>Pnma</i> | Eu <sub>2</sub> CuS <sub>3</sub> | 10.6071      | 4.0925       | 13.4172      | 582.43                     | 0.7906     |
| EuDyCuSe <sub>3</sub> | <i>Pnma</i> | Eu <sub>2</sub> CuS <sub>3</sub> | 10.5659      | 4.0855       | 13.4133      | 579.01                     | 0.7877     |
| EuHoCuSe <sub>3</sub> | <i>Pnma</i> | Eu <sub>2</sub> CuS <sub>3</sub> | 10.5309      | 4.0771       | 13.4115      | 575.83                     | 0.7852     |
| EuYCuSe <sub>3</sub>  | <i>Pnma</i> | Eu <sub>2</sub> CuS <sub>3</sub> | 10.5250      | 4.07228      | 13.4029      | 574.46                     | 0.7853     |
| EuErCuSe <sub>3</sub> | <i>Cmcm</i> | KZrCuS <sub>3</sub>              | 4.0726       | 13.4031      | 10.4800      | 572.06                     | 0.3886     |
| EuTmCuSe <sub>3</sub> | <i>Cmcm</i> | KZrCuS <sub>3</sub>              | 4.0658       | 13.4016      | 10.4489      | 569.34                     | 0.3891     |
| EuYbCuSe <sub>3</sub> | <i>Cmcm</i> | KZrCuS <sub>3</sub>              | 4.0591       | 13.3971      | 10.4170      | 566.49                     | 0.3897     |
| EuLuCuSe <sub>3</sub> | <i>Cmcm</i> | KZrCuS <sub>3</sub>              | 4.0539       | 13.3879      | 10.3912      | 563.96                     | 0.3901     |

**Table S7.** Bond valence calculation data for the Eu, Ln and Cu ions in the structures of EuLnCuSe<sub>3</sub>.

| Compound              | Eu    | Ln    | Cu    |
|-----------------------|-------|-------|-------|
| EuLaCuSe <sub>3</sub> | 1.993 | 2.742 | 1.200 |
| EuSmCuSe <sub>3</sub> | 1.797 | 3.202 | 1.136 |
| EuGdCuSe <sub>3</sub> | 1.782 | 3.216 | 1.146 |
| EuTbCuSe <sub>3</sub> | 1.792 | 3.167 | 1.155 |
| EuDyCuSe <sub>3</sub> | 1.788 | 3.070 | 1.161 |
| EuHoCuSe <sub>3</sub> | 1.771 | 3.134 | 1.196 |
| EuYCuSe <sub>3</sub>  | 1.759 | 3.090 | 1.150 |
| EuTmCuSe <sub>3</sub> | 1.658 | 3.052 | 1.181 |
| EuYbCuSe <sub>3</sub> | 1.655 | 2.966 | 1.196 |
| EuLuCuSe <sub>3</sub> | 1.661 | 3.000 | 1.204 |

**Table S8.** Elastic constants (GPa) for EuLnCuSe<sub>3</sub>.

| <b>Compound</b>       | <b>Space group</b> | <b>Structural type</b>           | <b>C<sub>11</sub></b> | <b>C<sub>12</sub></b> | <b>C<sub>13</sub></b> | <b>C<sub>22</sub></b> | <b>C<sub>23</sub></b> | <b>C<sub>33</sub></b> | <b>C<sub>44</sub></b> | <b>C<sub>55</sub></b> | <b>C<sub>66</sub></b> |
|-----------------------|--------------------|----------------------------------|-----------------------|-----------------------|-----------------------|-----------------------|-----------------------|-----------------------|-----------------------|-----------------------|-----------------------|
| EuLaCuSe <sub>3</sub> | <i>Pnma</i>        | Ba <sub>2</sub> MnS <sub>3</sub> | 108                   | 54                    | 62                    | 136                   | 46                    | 128                   | 27                    | 40                    | 46                    |
| EuCeCuSe <sub>3</sub> | <i>Pnma</i>        | Ba <sub>2</sub> MnS <sub>3</sub> | 106                   | 55                    | 62                    | 137                   | 47                    | 128                   | 28                    | 41                    | 47                    |
| EuPrCuSe <sub>3</sub> | <i>Pnma</i>        | Eu <sub>2</sub> CuS <sub>3</sub> | 119                   | 36                    | 50                    | 139                   | 47                    | 84                    | 43                    | 22                    | 34                    |
| EuNdCuSe <sub>3</sub> | <i>Pnma</i>        | Eu <sub>2</sub> CuS <sub>3</sub> | 117                   | 35                    | 48                    | 140                   | 48                    | 89                    | 44                    | 19                    | 35                    |
| EuSmCuSe <sub>3</sub> | <i>Pnma</i>        | Eu <sub>2</sub> CuS <sub>3</sub> | 118                   | 36                    | 47                    | 143                   | 49                    | 95                    | 46                    | 15                    | 36                    |
| EuGdCuSe <sub>3</sub> | <i>Pnma</i>        | Eu <sub>2</sub> CuS <sub>3</sub> | 116                   | 36                    | 45                    | 145                   | 51                    | 98                    | 47                    | 11                    | 37                    |
| EuTbCuSe <sub>3</sub> | <i>Pnma</i>        | Eu <sub>2</sub> CuS <sub>3</sub> | 116                   | 37                    | 44                    | 145                   | 51                    | 101                   | 48                    | 11                    | 37                    |
| EuDyCuSe <sub>3</sub> | <i>Pnma</i>        | Eu <sub>2</sub> CuS <sub>3</sub> | 115                   | 36                    | 44                    | 146                   | 51                    | 102                   | 49                    | 8                     | 38                    |
| EuHoCuSe <sub>3</sub> | <i>Pnma</i>        | Eu <sub>2</sub> CuS <sub>3</sub> | 116                   | 37                    | 44                    | 147                   | 51                    | 102                   | 49                    | 4                     | 38                    |
| EuYCuSe <sub>3</sub>  | <i>Pnma</i>        | Eu <sub>2</sub> CuS <sub>3</sub> | 117                   | 35                    | 47                    | 146                   | 50                    | 105                   | 49                    | 11                    | 38                    |
| EuErCuSe <sub>3</sub> | <i>Cmcm</i>        | KZrCuS <sub>3</sub>              | 148                   | 52                    | 36                    | 105                   | 45                    | 124                   | 4                     | 38                    | 51                    |
| EuTmCuSe <sub>3</sub> | <i>Cmcm</i>        | KZrCuS <sub>3</sub>              | 149                   | 52                    | 37                    | 106                   | 45                    | 126                   | 6                     | 39                    | 51                    |
| EuYbCuSe <sub>3</sub> | <i>Cmcm</i>        | KZrCuS <sub>3</sub>              | 149                   | 52                    | 37                    | 106                   | 45                    | 127                   | 7                     | 39                    | 51                    |
| EuLuCuSe <sub>3</sub> | <i>Cmcm</i>        | KZrCuS <sub>3</sub>              | 149                   | 52                    | 37                    | 107                   | 45                    | 128                   | 7                     | 39                    | 51                    |

**Table S9.** Bulk (*B*), shear (*G*) and Young's modulus (GPa) of EuLnCuSe<sub>3</sub>.

| Compound              | Space group | Structural type                  | Averaging scheme | <i>B</i> | <i>G</i> | Young's | Poisson ratio |
|-----------------------|-------------|----------------------------------|------------------|----------|----------|---------|---------------|
| EuLaCuSe <sub>3</sub> | <i>Pnma</i> | Ba <sub>2</sub> MnS <sub>3</sub> | Voigt            | 77.3     | 36.6     | 94.9    | 0.295         |
|                       |             |                                  | Reuss            | 77.1     | 34.7     | 90.4    | 0.305         |
|                       |             |                                  | Hill             | 77.2     | 35.6     | 92.7    | 0.300         |
| EuCeCuSe <sub>3</sub> | <i>Pnma</i> | Ba <sub>2</sub> MnS <sub>3</sub> | Voigt            | 77.8     | 37.1     | 96.1    | 0.294         |
|                       |             |                                  | Reuss            | 77.5     | 35.0     | 91.2    | 0.304         |
|                       |             |                                  | Hill             | 77.6     | 36.1     | 93.7    | 0.299         |
| EuPrCuSe <sub>3</sub> | <i>Pnma</i> | Eu <sub>2</sub> CuS <sub>3</sub> | Voigt            | 67.5     | 33.8     | 86.8    | 0.286         |
|                       |             |                                  | Reuss            | 65.7     | 30.3     | 78.9    | 0.300         |
|                       |             |                                  | Hill             | 66.6     | 32.0     | 82.8    | 0.293         |
| EuNdCuSe <sub>3</sub> | <i>Pnma</i> | Eu <sub>2</sub> CuS <sub>3</sub> | Voigt            | 67.7     | 33.9     | 87.1    | 0.286         |
|                       |             |                                  | Reuss            | 66.4     | 30.0     | 78.2    | 0.304         |
|                       |             |                                  | Hill             | 67.1     | 31.9     | 82.7    | 0.295         |
| EuSmCuSe <sub>3</sub> | <i>Pnma</i> | Eu <sub>2</sub> CuS <sub>3</sub> | Voigt            | 68.8     | 34.2     | 87.9    | 0.287         |
|                       |             |                                  | Reuss            | 67.7     | 28.2     | 74.3    | 0.317         |
|                       |             |                                  | Hill             | 68.2     | 31.2     | 81.2    | 0.302         |
| EuGdCuSe <sub>3</sub> | <i>Pnma</i> | Eu <sub>2</sub> CuS <sub>3</sub> | Voigt            | 69.0     | 34.2     | 88.1    | 0.287         |
|                       |             |                                  | Reuss            | 67.9     | 25.9     | 69.0    | 0.331         |
|                       |             |                                  | Hill             | 68.5     | 30.1     | 78.7    | 0.308         |
| EuTbCuSe <sub>3</sub> | <i>Pnma</i> | Eu <sub>2</sub> CuS <sub>3</sub> | Voigt            | 69.7     | 34.6     | 89.1    | 0.287         |
|                       |             |                                  | Reuss            | 68.5     | 26.0     | 69.2    | 0.332         |
|                       |             |                                  | Hill             | 69.1     | 30.3     | 79.3    | 0.309         |
| EuDyCuSe <sub>3</sub> | <i>Pnma</i> | Eu <sub>2</sub> CuS <sub>3</sub> | Voigt            | 69.7     | 34.2     | 88.2    | 0.289         |
|                       |             |                                  | Reuss            | 68.6     | 21.3     | 57.9    | 0.359         |
|                       |             |                                  | Hill             | 69.1     | 27.8     | 73.4    | 0.323         |
| EuHoCuSe <sub>3</sub> | <i>Pnma</i> | Eu <sub>2</sub> CuS <sub>3</sub> | Voigt            | 69.8     | 33.8     | 87.3    | 0.292         |
|                       |             |                                  | Reuss            | 68.6     | 14.9     | 41.6    | 0.399         |
|                       |             |                                  | Hill             | 69.2     | 24.3     | 65.3    | 0.343         |
| EuYCuSe <sub>3</sub>  | <i>Pnma</i> | Eu <sub>2</sub> CuS <sub>3</sub> | Voigt            | 70.3     | 35.3     | 90.7    | 0.285         |
|                       |             |                                  | Reuss            | 69.6     | 25.5     | 68.3    | 0.337         |
|                       |             |                                  | Hill             | 70.0     | 30.4     | 79.7    | 0.310         |
| EuErCuSe <sub>3</sub> | <i>Cmcm</i> | KZrCuS <sub>3</sub>              | Voigt            | 71.4     | 35.0     | 90.2    | 0.289         |
|                       |             |                                  | Reuss            | 70.4     | 15.3     | 42.8    | 0.399         |
|                       |             |                                  | Hill             | 70.9     | 25.1     | 67.4    | 0.341         |
| EuTmCuSe <sub>3</sub> | <i>Cmcm</i> | KZrCuS <sub>3</sub>              | Voigt            | 71.8     | 35.5     | 91.5    | 0.288         |
|                       |             |                                  | Reuss            | 70.9     | 18.4     | 50.7    | 0.381         |
|                       |             |                                  | Hill             | 71.4     | 26.9     | 71.8    | 0.332         |
| EuYbCuSe <sub>3</sub> | <i>Cmcm</i> | KZrCuS <sub>3</sub>              | Voigt            | 72.2     | 35.9     | 92.3    | 0.287         |
|                       |             |                                  | Reuss            | 71.3     | 20.3     | 55.7    | 0.370         |
|                       |             |                                  | Hill             | 71.7     | 28.1     | 74.5    | 0.327         |
| EuLuCuSe <sub>3</sub> | <i>Cmcm</i> | KZrCuS <sub>3</sub>              | Voigt            | 72.5     | 36.2     | 93.0    | 0.286         |
|                       |             |                                  | Reuss            | 71.6     | 21.4     | 58.5    | 0.364         |
|                       |             |                                  | Hill             | 72.0     | 28.8     | 76.2    | 0.324         |

**Table S10.** Calculated IR wavenumbers (cm<sup>-1</sup>) for EuLnCuSe<sub>3</sub>.

| Pnma space group        |       |           |       |                         |       |           |       |           |       |           |       |           |       |           |       | Cmcm space group        |       |          |       |           |       |           |       |           |       |           |       |
|-------------------------|-------|-----------|-------|-------------------------|-------|-----------|-------|-----------|-------|-----------|-------|-----------|-------|-----------|-------|-------------------------|-------|----------|-------|-----------|-------|-----------|-------|-----------|-------|-----------|-------|
| Ba2MnS3 structural type |       |           |       | Eu2CuS3 structural type |       |           |       |           |       |           |       |           |       |           |       | KZrCuS3 structural type |       |          |       |           |       |           |       |           |       |           |       |
| EuLaCuSe3               |       | EuCeCuSe3 |       | EuPrCuSe3               |       | EuNdCuSe3 |       | EuSmCuSe3 |       | EuGdCuSe3 |       | EuTbCuSe3 |       | EuDyCuSe3 |       | EuHoCuSe3               |       | EuYCuSe3 |       | EuErCuSe3 |       | EuTmCuSe3 |       | EuYbCuSe3 |       | EuLuCuSe3 |       |
| B1u                     | 45.9  | B1u       | 46.0  | B3u                     | 52.9  | B3u       | 52.3  | B3u       | 50.8  | B3u       | 49.9  | B3u       | 49.4  | B3u       | 48.8  | B3u                     | 48.9  | B3u      | 52.2  | B1u       | 45.8  | B1u       | 46.3  | B1u       | 46.3  | B1u       | 46.5  |
| B2u                     | 59.9  | B2u       | 60.6  | B1u                     | 62.1  | B1u       | 61.6  | B1u       | 60.9  | B1u       | 60.2  | B1u       | 59.7  | B1u       | 59.2  | B1u                     | 59.1  | B1u      | 58.0  | B2u       | 82.0  | B2u       | 81.3  | B2u       | 80.3  | B2u       | 79.8  |
| B3u                     | 61.9  | B3u       | 62.2  | B3u                     | 75.3  | B3u       | 75.5  | B3u       | 76.1  | B3u       | 76.2  | B3u       | 76.0  | B3u       | 75.7  | B3u                     | 75.6  | B3u      | 74.6  | B1u       | 91.3  | B1u       | 90.7  | B1u       | 89.7  | B1u       | 89.0  |
| B3u                     | 79.8  | B3u       | 80.1  | B1u                     | 83.3  | B1u       | 83.8  | B1u       | 84.3  | B2u       | 82.5  | B2u       | 83.3  | B2u       | 82.7  | B2u                     | 84.5  | B1u      | 83.9  | B1u       | 93.9  | B1u       | 94.2  | B1u       | 94.2  | B1u       | 94.6  |
| B3u                     | 90.5  | B3u       | 90.4  | B2u                     | 87.3  | B2u       | 84.6  | B2u       | 86.5  | B1u       | 84.6  | B1u       | 84.8  | B1u       | 85.0  | B1u                     | 85.0  | B2u      | 90.6  | B2u       | 100.4 | B2u       | 99.8  | B2u       | 99.5  | B2u       | 99.3  |
| B1u                     | 90.6  | B1u       | 90.9  | B3u                     | 93.3  | B3u       | 93.4  | B3u       | 93.4  | B3u       | 92.7  | B3u       | 92.5  | B3u       | 91.9  | B3u                     | 91.5  | B2u      | 98.7  | B3u       | 100.5 | B3u       | 100.5 | B3u       | 100.8 | B3u       | 100.4 |
| B3u                     | 92.6  | B3u       | 92.2  | B2u                     | 96.3  | B2u       | 93.9  | B3u       | 95.5  | B3u       | 95.3  | B3u       | 95.4  | B3u       | 95.0  | B3u                     | 95.5  | B3u      | 99.3  | B3u       | 109.5 | B3u       | 108.9 | B3u       | 108.0 | B3u       | 107.5 |
| B2u                     | 97.3  | B2u       | 97.1  | B3u                     | 96.5  | B3u       | 96.4  | B1u       | 99.8  | B2u       | 95.7  | B2u       | 97.6  | B2u       | 98.4  | B1u                     | 101.1 | B1u      | 101.0 | B3u       | 132.2 | B3u       | 131.1 | B3u       | 129.3 | B3u       | 126.9 |
| B1u                     | 103.2 | B1u       | 102.1 | B1u                     | 99.4  | B1u       | 99.4  | B2u       | 101.2 | B1u       | 100.2 | B1u       | 100.3 | B1u       | 100.5 | B2u                     | 102.9 | B3u      | 101.7 | B2u       | 148.1 | B2u       | 149.0 | B2u       | 147.8 | B2u       | 147.6 |
| B1u                     | 108.3 | B1u       | 108.9 | B3u                     | 104.5 | B3u       | 104.3 | B3u       | 104.8 | B3u       | 105.1 | B3u       | 105.4 | B3u       | 105.7 | B3u                     | 105.9 | B3u      | 108.3 | B1u       | 154.3 | B1u       | 153.7 | B1u       | 152.3 | B1u       | 151.6 |
| B3u                     | 115.6 | B3u       | 115.3 | B1u                     | 110.8 | B1u       | 111.3 | B1u       | 111.2 | B1u       | 110.9 | B1u       | 110.6 | B1u       | 110.1 | B1u                     | 109.9 | B1u      | 117.6 | B3u       | 175.0 | B3u       | 175.3 | B3u       | 175.8 | B3u       | 176.2 |
| B1u                     | 125.6 | B1u       | 125.6 | B1u                     | 135.3 | B1u       | 135.4 | B1u       | 133.1 | B1u       | 131.9 | B1u       | 131.8 | B1u       | 130.2 | B1u                     | 129.7 | B2u      | 143.7 | B1u       | 181.3 | B1u       | 180.6 | B1u       | 179.1 | B1u       | 178.5 |
| B1u                     | 133.6 | B1u       | 134.0 | B2u                     | 141.2 | B2u       | 141.3 | B2u       | 147.0 | B2u       | 141.6 | B2u       | 142.6 | B2u       | 146.0 | B2u                     | 143.7 | B1u      | 153.3 | B3u       | 191.6 | B3u       | 190.2 | B3u       | 188.4 | B3u       | 187.5 |
| B3u                     | 135.5 | B3u       | 135.3 | B1u                     | 155.1 | B1u       | 155.5 | B3u       | 156.0 | B3u       | 155.5 | B2u       | 152.0 | B3u       | 154.6 | B2u                     | 151.6 | B1u      | 158.0 | B2u       | 196.4 | B1u       | 197.0 | B1u       | 197.1 | B1u       | 197.6 |
| B2u                     | 139.1 | B2u       | 140.4 | B2u                     | 157.6 | B2u       | 156.1 | B1u       | 156.0 | B1u       | 156.3 | B3u       | 155.4 | B1u       | 156.2 | B3u                     | 154.1 | B3u      | 169.8 | B1u       | 196.5 | B2u       | 197.2 | B2u       | 198.7 | B2u       | 199.4 |
| B3u                     | 145.3 | B3u       | 146.4 | B3u                     | 157.7 | B3u       | 157.5 | B2u       | 159.6 | B2u       | 158.2 | B1u       | 156.3 | B2u       | 158.1 | B1u                     | 155.9 | B2u      | 170.1 | B3u       | 206.2 | B3u       | 206.0 | B3u       | 205.8 | B3u       | 206.1 |
| B2u                     | 155.4 | B2u       | 156.0 | B1u                     | 169.3 | B2u       | 169.4 | B1u       | 171.6 | B1u       | 172.9 | B1u       | 173.5 | B1u       | 174.0 | B1u                     | 174.3 | B1u      | 175.0 |           |       |           |       |           |       |           |       |
| B1u                     | 159.6 | B1u       | 159.9 | B2u                     | 174.2 | B1u       | 170.0 | B1u       | 178.2 | B1u       | 179.3 | B1u       | 179.5 | B3u       | 180.0 | B3u                     | 179.4 | B1u      | 181.1 |           |       |           |       |           |       |           |       |
| B3u                     | 167.5 | B1u       | 166.8 | B1u                     | 176.2 | B1u       | 176.8 | B3u       | 179.7 | B3u       | 180.4 | B3u       | 180.5 | B1u       | 180.1 | B1u                     | 180.5 | B3u      | 182.3 |           |       |           |       |           |       |           |       |
| B1u                     | 167.6 | B3u       | 167.2 | B3u                     | 177.2 | B3u       | 178.5 | B3u       | 180.5 | B3u       | 181.4 | B3u       | 181.8 | B3u       | 182.0 | B3u                     | 182.3 | B3u      | 187.2 |           |       |           |       |           |       |           |       |
| B3u                     | 174.6 | B3u       | 174.7 | B3u                     | 177.9 | B3u       | 178.8 | B3u       | 185.0 | B2u       | 183.0 | B3u       | 186.8 | B3u       | 187.3 | B3u                     | 187.6 | B1u      | 192.9 |           |       |           |       |           |       |           |       |
| B1u                     | 181.5 | B1u       | 181.7 | B3u                     | 184.8 | B3u       | 185.0 | B2u       | 186.0 | B3u       | 186.3 | B2u       | 188.4 | B2u       | 190.9 | B1u                     | 192.3 | B3u      | 193.7 |           |       |           |       |           |       |           |       |
| B1u                     | 186.7 | B1u       | 186.5 | B3u                     | 191.9 | B3u       | 192.7 | B1u       | 193.3 | B1u       | 193.3 | B1u       | 193.5 | B1u       | 192.8 | B2u                     | 195.1 | B2u      | 195.0 |           |       |           |       |           |       |           |       |
| B3u                     | 197.8 | B3u       | 197.8 | B1u                     | 192.4 | B1u       | 192.8 | B3u       | 194.2 | B3u       | 195.4 | B3u       | 195.9 | B3u       | 196.2 | B3u                     | 196.6 | B3u      | 198.2 |           |       |           |       |           |       |           |       |
| B2u                     | 207.4 | B2u       | 207.0 | B1u                     | 196.8 | B1u       | 197.9 | B1u       | 198.7 | B1u       | 198.7 | B1u       | 198.3 | B1u       | 197.2 | B1u                     | 196.8 | B3u      | 211.7 |           |       |           |       |           |       |           |       |
| B1u                     | 208.2 | B1u       | 208.4 | B3u                     | 200.6 | B3u       | 200.5 | B3u       | 199.9 | B3u       | 199.3 | B3u       | 198.9 | B3u       | 198.1 | B3u                     | 197.8 | B1u      | 218.3 |           |       |           |       |           |       |           |       |
| B3u                     | 223.5 | B3u       | 223.2 | B1u                     | 211.3 | B1u       | 210.5 | B1u       | 207.3 | B1u       | 206.7 | B1u       | 206.7 | B1u       | 206.2 | B1u                     | 206.3 | B1u      | 228.7 |           |       |           |       |           |       |           |       |

**Table S11.** Calculated Raman wavenumbers (cm<sup>-1</sup>) for EuLnCuSe<sub>3</sub>.

| Pnma space group                                 |       |                       |       |                                                  |       |                       |       |                       |       |                       |       |                       |       |                       |       |                       |       |                      | Cmcm space group                    |                       |       |                       |       |                       |       |                       |       |  |  |  |  |
|--------------------------------------------------|-------|-----------------------|-------|--------------------------------------------------|-------|-----------------------|-------|-----------------------|-------|-----------------------|-------|-----------------------|-------|-----------------------|-------|-----------------------|-------|----------------------|-------------------------------------|-----------------------|-------|-----------------------|-------|-----------------------|-------|-----------------------|-------|--|--|--|--|
| Ba <sub>2</sub> MnS <sub>3</sub> structural type |       |                       |       | Eu <sub>2</sub> CuS <sub>3</sub> structural type |       |                       |       |                       |       |                       |       |                       |       |                       |       |                       |       |                      | KZrCuS <sub>3</sub> structural type |                       |       |                       |       |                       |       |                       |       |  |  |  |  |
| EuLaCuSe <sub>3</sub>                            |       | EuCeCuSe <sub>3</sub> |       | EuPrCuSe <sub>3</sub>                            |       | EuNdCuSe <sub>3</sub> |       | EuSmCuSe <sub>3</sub> |       | EuGdCuSe <sub>3</sub> |       | EuTbCuSe <sub>3</sub> |       | EuDyCuSe <sub>3</sub> |       | EuHoCuSe <sub>3</sub> |       | EuYCuSe <sub>3</sub> |                                     | EuErCuSe <sub>3</sub> |       | EuTmCuSe <sub>3</sub> |       | EuYbCuSe <sub>3</sub> |       | EuLuCuSe <sub>3</sub> |       |  |  |  |  |
| B <sub>1g</sub>                                  | 41.2  | B <sub>1g</sub>       | 41.9  | A <sub>g</sub>                                   | 29.9  | A <sub>g</sub>        | 27.6  | A <sub>g</sub>        | 22.9  | A <sub>g</sub>        | 20.4  | A <sub>g</sub>        | 18.9  | A <sub>g</sub>        | 17.4  | A <sub>g</sub>        | 18.2  | 15.9                 | A <sub>g</sub>                      | B <sub>2g</sub>       | 62.2  | B <sub>2g</sub>       | 63.4  | B <sub>1g</sub>       | 64.1  | B <sub>1g</sub>       | 63.9  |  |  |  |  |
| A <sub>g</sub>                                   | 42.8  | A <sub>g</sub>        | 43.1  | A <sub>g</sub>                                   | 40.1  | A <sub>g</sub>        | 41.2  | A <sub>g</sub>        | 42.8  | A <sub>g</sub>        | 44.5  | A <sub>g</sub>        | 45.3  | A <sub>g</sub>        | 45.8  | A <sub>g</sub>        | 46.4  | 52.8                 | A <sub>g</sub>                      | B <sub>1g</sub>       | 64.2  | B <sub>1g</sub>       | 64.1  | B <sub>2g</sub>       | 64.3  | B <sub>2g</sub>       | 65.5  |  |  |  |  |
| A <sub>g</sub>                                   | 63.9  | A <sub>g</sub>        | 64.4  | B <sub>1g</sub>                                  | 52.3  | B <sub>1g</sub>       | 68.7  | B <sub>1g</sub>       | 50.6  | B <sub>1g</sub>       | 50.7  | B <sub>1g</sub>       | 51.2  | B <sub>1g</sub>       | 50.6  | B <sub>1g</sub>       | 50.8  | 58.6                 | B <sub>1g</sub>                     | A <sub>g</sub>        | 67.7  | A <sub>g</sub>        | 67.5  | A <sub>g</sub>        | 67.4  | A <sub>g</sub>        | 67.3  |  |  |  |  |
| B <sub>3g</sub>                                  | 66.9  | B <sub>3g</sub>       | 67.7  | B <sub>2g</sub>                                  | 60.0  | B <sub>3g</sub>       | 96.4  | B <sub>2g</sub>       | 61.1  | B <sub>3g</sub>       | 60.0  | B <sub>2g</sub>       | 61.3  | B <sub>3g</sub>       | 61.3  | B <sub>2g</sub>       | 61.4  | 62.6                 | B <sub>3g</sub>                     | B <sub>2g</sub>       | 96.1  | B <sub>2g</sub>       | 95.6  | B <sub>2g</sub>       | 95.1  | B <sub>2g</sub>       | 94.6  |  |  |  |  |
| B <sub>1g</sub>                                  | 67.2  | B <sub>1g</sub>       | 67.9  | B <sub>3g</sub>                                  | 60.9  | B <sub>2g</sub>       | 99.9  | B <sub>3g</sub>       | 62.0  | B <sub>2g</sub>       | 61.2  | B <sub>3g</sub>       | 61.4  | B <sub>2g</sub>       | 61.3  | B <sub>3g</sub>       | 62.5  | 63.4                 | B <sub>2g</sub>                     | B <sub>1g</sub>       | 101.0 | B <sub>1g</sub>       | 100.3 | B <sub>1g</sub>       | 100.0 | B <sub>1g</sub>       | 99.6  |  |  |  |  |
| B <sub>2g</sub>                                  | 69.1  | B <sub>2g</sub>       | 69.2  | B <sub>1g</sub>                                  | 65.8  | B <sub>1g</sub>       | 112.2 | B <sub>3g</sub>       | 68.3  | B <sub>1g</sub>       | 64.0  | B <sub>1g</sub>       | 65.9  | B <sub>1g</sub>       | 66.3  | B <sub>2g</sub>       | 67.6  | 65.6                 | B <sub>1g</sub>                     | A <sub>g</sub>        | 105.5 | A <sub>g</sub>        | 105.1 | A <sub>g</sub>        | 105.0 | A <sub>g</sub>        | 104.9 |  |  |  |  |
| B <sub>2g</sub>                                  | 75.7  | B <sub>2g</sub>       | 76.0  | A <sub>g</sub>                                   | 68.5  | B <sub>3g</sub>       | 159.0 | B <sub>2g</sub>       | 68.4  | B <sub>3g</sub>       | 66.3  | B <sub>3g</sub>       | 66.9  | B <sub>3g</sub>       | 66.6  | B <sub>3g</sub>       | 67.8  | 66.2                 | B <sub>2g</sub>                     | B <sub>3g</sub>       | 146.1 | B <sub>3g</sub>       | 146.7 | B <sub>3g</sub>       | 146.1 | B <sub>3g</sub>       | 145.6 |  |  |  |  |
| A <sub>g</sub>                                   | 81.0  | A <sub>g</sub>        | 80.8  | B <sub>3g</sub>                                  | 69.2  | A <sub>g</sub>        | 167.0 | B <sub>1g</sub>       | 68.9  | B <sub>2g</sub>       | 67.9  | B <sub>2g</sub>       | 67.4  | B <sub>2g</sub>       | 66.9  | A <sub>g</sub>        | 68.4  | 66.8                 | A <sub>g</sub>                      | B <sub>1g</sub>       | 150.0 | B <sub>1g</sub>       | 150.5 | B <sub>1g</sub>       | 149.9 | B <sub>1g</sub>       | 149.4 |  |  |  |  |
| B <sub>2g</sub>                                  | 82.0  | B <sub>2g</sub>       | 82.7  | B <sub>2g</sub>                                  | 70.8  | B <sub>2g</sub>       | 180.4 | A <sub>g</sub>        | 69.1  | A <sub>g</sub>        | 69.0  | A <sub>g</sub>        | 68.8  | A <sub>g</sub>        | 68.6  | B <sub>1g</sub>       | 69.0  | 78.1                 | B <sub>3g</sub>                     | B <sub>2g</sub>       | 159.0 | B <sub>2g</sub>       | 158.7 | B <sub>2g</sub>       | 158.1 | B <sub>2g</sub>       | 157.7 |  |  |  |  |
| B <sub>3g</sub>                                  | 85.0  | B <sub>3g</sub>       | 86.0  | B <sub>2g</sub>                                  | 79.1  | B <sub>2g</sub>       | 184.3 | B <sub>2g</sub>       | 77.6  | B <sub>2g</sub>       | 76.8  | B <sub>2g</sub>       | 76.8  | B <sub>2g</sub>       | 76.9  | B <sub>2g</sub>       | 77.1  | 86.0                 | B <sub>2g</sub>                     | A <sub>g</sub>        | 173.3 | A <sub>g</sub>        | 173.6 | A <sub>g</sub>        | 173.7 | A <sub>g</sub>        | 174.0 |  |  |  |  |
| A <sub>g</sub>                                   | 85.8  | A <sub>g</sub>        | 86.4  | A <sub>g</sub>                                   | 96.9  | B <sub>3g</sub>       | 195.0 | A <sub>g</sub>        | 96.4  | A <sub>g</sub>        | 96.0  | A <sub>g</sub>        | 96.3  | A <sub>g</sub>        | 96.4  | B <sub>2g</sub>       | 96.5  | 96.0                 | B <sub>2g</sub>                     | A <sub>g</sub>        | 185.0 | A <sub>g</sub>        | 185.0 | A <sub>g</sub>        | 185.0 | A <sub>g</sub>        | 185.1 |  |  |  |  |
| B <sub>3g</sub>                                  | 101.0 | B <sub>3g</sub>       | 101.1 | B <sub>3g</sub>                                  | 97.2  | A <sub>g</sub>        | 210.4 | B <sub>2g</sub>       | 96.8  | B <sub>2g</sub>       | 96.4  | B <sub>2g</sub>       | 96.6  | B <sub>2g</sub>       | 96.4  | A <sub>g</sub>        | 96.9  | 97.3                 | B <sub>3g</sub>                     | B <sub>2g</sub>       | 193.3 | B <sub>2g</sub>       | 193.5 | B <sub>2g</sub>       | 193.3 | B <sub>2g</sub>       | 193.3 |  |  |  |  |
| B <sub>1g</sub>                                  | 102.5 | B <sub>1g</sub>       | 102.6 | B <sub>2g</sub>                                  | 97.9  | B <sub>2g</sub>       | 60.4  | A <sub>g</sub>        | 101.2 | B <sub>3g</sub>       | 96.6  | B <sub>3g</sub>       | 98.3  | B <sub>3g</sub>       | 99.0  | A <sub>g</sub>        | 102.7 | 102.4                | A <sub>g</sub>                      | B <sub>1g</sub>       | 195.1 | B <sub>1g</sub>       | 195.8 | A <sub>g</sub>        | 196.2 | A <sub>g</sub>        | 196.3 |  |  |  |  |
| B <sub>2g</sub>                                  | 104.7 | B <sub>2g</sub>       | 104.7 | A <sub>g</sub>                                   | 99.1  | B <sub>1g</sub>       | 68.2  | B <sub>3g</sub>       | 102.1 | B <sub>1g</sub>       | 98.8  | B <sub>1g</sub>       | 100.2 | B <sub>1g</sub>       | 100.4 | B <sub>3g</sub>       | 103.5 | 104.20               | B <sub>1g</sub>                     | A <sub>g</sub>        | 196.3 | A <sub>g</sub>        | 196.2 | B <sub>1g</sub>       | 197.3 | B <sub>1g</sub>       | 198.0 |  |  |  |  |
| A <sub>g</sub>                                   | 118.0 | A <sub>g</sub>        | 118.4 | B <sub>1g</sub>                                  | 101.6 | A <sub>g</sub>        | 88.4  | B <sub>1g</sub>       | 104.2 | A <sub>g</sub>        | 102.2 | A <sub>g</sub>        | 102.8 | A <sub>g</sub>        | 102.7 | B <sub>1g</sub>       | 104.6 | 104.23               | A <sub>g</sub>                      | B <sub>2g</sub>       | 198.9 | B <sub>2g</sub>       | 199.3 | B <sub>2g</sub>       | 199.4 | B <sub>2g</sub>       | 199.7 |  |  |  |  |
| B <sub>2g</sub>                                  | 122.9 | B <sub>2g</sub>       | 122.6 | B <sub>2g</sub>                                  | 106.9 | B <sub>2g</sub>       | 143.3 | B <sub>2g</sub>       | 108.2 | B <sub>2g</sub>       | 109.3 | A <sub>g</sub>        | 109.1 | A <sub>g</sub>        | 108.5 | A <sub>g</sub>        | 108.3 | 113.6                | A <sub>g</sub>                      |                       |       |                       |       |                       |       |                       |       |  |  |  |  |
| B <sub>3g</sub>                                  | 126.1 | A <sub>g</sub>        | 127.1 | A <sub>g</sub>                                   | 112.3 | A <sub>g</sub>        | 154.3 | A <sub>g</sub>        | 110.4 | A <sub>g</sub>        | 109.6 | B <sub>2g</sub>       | 109.5 | B <sub>2g</sub>       | 109.4 | B <sub>2g</sub>       | 109.4 | 114.2                | B <sub>2g</sub>                     |                       |       |                       |       |                       |       |                       |       |  |  |  |  |
| B <sub>2g</sub>                                  | 127.7 | B <sub>3g</sub>       | 127.2 | B <sub>1g</sub>                                  | 144.7 | B <sub>1g</sub>       | 169.8 | B <sub>2g</sub>       | 144.0 | B <sub>2g</sub>       | 142.9 | B <sub>2g</sub>       | 142.7 | B <sub>2g</sub>       | 141.3 | B <sub>2g</sub>       | 140.9 | 148.0                | B <sub>1g</sub>                     |                       |       |                       |       |                       |       |                       |       |  |  |  |  |
| A <sub>g</sub>                                   | 127.8 | B <sub>2g</sub>       | 127.5 | B <sub>2g</sub>                                  | 145.2 | B <sub>2g</sub>       | 51.7  | B <sub>1g</sub>       | 150.8 | B <sub>1g</sub>       | 145.6 | B <sub>1g</sub>       | 146.9 | B <sub>1g</sub>       | 150.3 | B <sub>1g</sub>       | 148.2 | 152.0                | B <sub>3g</sub>                     |                       |       |                       |       |                       |       |                       |       |  |  |  |  |
| B <sub>1g</sub>                                  | 140.1 | B <sub>1g</sub>       | 141.5 | B <sub>3g</sub>                                  | 147.1 | B <sub>3g</sub>       | 64.0  | B <sub>3g</sub>       | 152.3 | B <sub>3g</sub>       | 146.8 | B <sub>3g</sub>       | 148.8 | B <sub>3g</sub>       | 151.9 | B <sub>3g</sub>       | 151.0 | 156.5                | B <sub>2g</sub>                     |                       |       |                       |       |                       |       |                       |       |  |  |  |  |
| B <sub>2g</sub>                                  | 142.6 | B <sub>2g</sub>       | 142.5 | B <sub>2g</sub>                                  | 157.8 | B <sub>1g</sub>       | 98.4  | A <sub>g</sub>        | 157.6 | A <sub>g</sub>        | 157.2 | B <sub>3g</sub>       | 153.5 | A <sub>g</sub>        | 156.5 | B <sub>3g</sub>       | 152.4 | 162.1                | B <sub>2g</sub>                     |                       |       |                       |       |                       |       |                       |       |  |  |  |  |
| A <sub>g</sub>                                   | 145.5 | A <sub>g</sub>        | 145.8 | B <sub>3g</sub>                                  | 158.5 | B <sub>3g</sub>       | 144.8 | B <sub>2g</sub>       | 158.7 | B <sub>2g</sub>       | 159.1 | B <sub>1g</sub>       | 154.1 | B <sub>2g</sub>       | 158.9 | B <sub>1g</sub>       | 154.1 | 169.3                | B <sub>3g</sub>                     |                       |       |                       |       |                       |       |                       |       |  |  |  |  |
| A <sub>g</sub>                                   | 149.0 | A <sub>g</sub>        | 149.4 | B <sub>1g</sub>                                  | 159.1 | B <sub>2g</sub>       | 157.3 | B <sub>3g</sub>       | 161.1 | B <sub>1g</sub>       | 160.5 | A <sub>g</sub>        | 157.2 | B <sub>3g</sub>       | 160.2 | A <sub>g</sub>        | 156.1 | 171.5                | A <sub>g</sub>                      |                       |       |                       |       |                       |       |                       |       |  |  |  |  |
| B <sub>2g</sub>                                  | 156.5 | B <sub>2g</sub>       | 156.4 | A <sub>g</sub>                                   | 159.3 | A <sub>g</sub>        | 170.9 | B <sub>1g</sub>       | 161.6 | B <sub>3g</sub>       | 160.5 | B <sub>2g</sub>       | 159.0 | B <sub>1g</sub>       | 160.5 | B <sub>2g</sub>       | 158.8 | 171.6                | B <sub>1g</sub>                     |                       |       |                       |       |                       |       |                       |       |  |  |  |  |
| B <sub>1g</sub>                                  | 161.1 | B <sub>3g</sub>       | 162.3 | A <sub>g</sub>                                   | 165.8 | A <sub>g</sub>        | 0.0   | A <sub>g</sub>        | 169.1 | A <sub>g</sub>        | 170.8 | A <sub>g</sub>        | 171.6 | A <sub>g</sub>        | 172.0 | A <sub>g</sub>        | 172.6 | 172.0                | A <sub>g</sub>                      |                       |       |                       |       |                       |       |                       |       |  |  |  |  |
| B <sub>3g</sub>                                  | 161.1 | B <sub>1g</sub>       | 162.3 | B <sub>2g</sub>                                  | 172.4 | B <sub>3g</sub>       | 61.6  | B <sub>2g</sub>       | 174.6 | B <sub>2g</sub>       | 176.0 | B <sub>2g</sub>       | 176.6 | B <sub>2g</sub>       | 176.9 | B <sub>2g</sub>       | 177.2 | 179.6                | B <sub>2g</sub>                     |                       |       |                       |       |                       |       |                       |       |  |  |  |  |
| A <sub>g</sub>                                   | 164.2 | A <sub>g</sub>        | 164.1 | B <sub>3g</sub>                                  | 173.2 | B <sub>1g</sub>       | 83.8  | A <sub>g</sub>        | 181.7 | B <sub>3g</sub>       | 181.9 | A <sub>g</sub>        | 182.7 | A <sub>g</sub>        | 181.9 | A <sub>g</sub>        | 181.6 | 184.7                | A <sub>g</sub>                      |                       |       |                       |       |                       |       |                       |       |  |  |  |  |
| B <sub>2g</sub>                                  | 169.5 | B <sub>2g</sub>       | 169.8 | B <sub>1g</sub>                                  | 175.5 | B <sub>2g</sub>       | 99.4  | A <sub>g</sub>        | 183.3 | A <sub>g</sub>        | 182.3 | A <sub>g</sub>        | 184.2 | A <sub>g</sub>        | 184.4 | A <sub>g</sub>        | 184.7 | 189.0                | B <sub>2g</sub>                     |                       |       |                       |       |                       |       |                       |       |  |  |  |  |
| A <sub>g</sub>                                   | 174.6 | A <sub>g</sub>        | 175.0 | A <sub>g</sub>                                   | 179.6 | A <sub>g</sub>        | 111.3 | B <sub>3g</sub>       | 185.0 | A <sub>g</sub>        | 183.7 | B <sub>3g</sub>       | 187.2 | B <sub>2g</sub>       | 186.4 | B <sub>2g</sub>       | 186.4 | 193.7                | B <sub>3g</sub>                     |                       |       |                       |       |                       |       |                       |       |  |  |  |  |
| B <sub>2g</sub>                                  | 185.2 | B <sub>2g</sub>       | 185.6 | A <sub>g</sub>                                   | 184.3 | A <sub>g</sub>        | 135.4 | B <sub>1g</sub>       | 187.0 | B <sub>1g</sub>       | 183.9 | B <sub>2g</sub>       | 187.2 | B <sub>3g</sub>       | 189.6 | B <sub>2g</sub>       | 192.5 | 194.9                | A <sub>g</sub>                      |                       |       |                       |       |                       |       |                       |       |  |  |  |  |
| A <sub>g</sub>                                   | 189.2 | A <sub>g</sub>        | 189.8 | B <sub>2g</sub>                                  | 189.9 | B <sub>2g</sub>       | 155.5 | B <sub>2g</sub>       | 188.2 | B <sub>2g</sub>       | 187.4 | B <sub>1g</sub>       | 189.3 | B <sub>1g</sub>       | 191.9 | B <sub>3g</sub>       | 194.0 | 195.8                | B <sub>1g</sub>                     |                       |       |                       |       |                       |       |                       |       |  |  |  |  |
| B <sub>2g</sub>                                  | 197.8 | B <sub>2g</sub>       | 198.3 | B <sub>2g</sub>                                  | 191.9 | B <sub>2g</sub>       | 170.0 | B <sub>2g</sub>       | 192.3 | B <sub>2g</sub>       | 192.4 | B <sub>2g</sub>       | 192.7 | B <sub>2g</sub>       | 192.7 | B <sub>1g</sub>       | 195.9 | 197.7                | A <sub>g</sub>                      |                       |       |                       |       |                       |       |                       |       |  |  |  |  |
| A <sub>g</sub>                                   | 208.7 | A <sub>g</sub>        | 208.8 | B <sub>2g</sub>                                  | 193.4 | B <sub>2g</sub>       | 176.8 | A <sub>g</sub>        | 196.1 | A <sub>g</sub>        | 197.1 | A <sub>g</sub>        | 197.2 | A <sub>g</sub>        | 197.1 | A <sub>g</sub>        | 197.0 | 199.1                | B <sub>2g</sub>                     |                       |       |                       |       |                       |       |                       |       |  |  |  |  |
| B <sub>3g</sub>                                  | 211.7 | B <sub>3g</sub>       | 211.7 | A <sub>g</sub>                                   | 194.3 | A <sub>g</sub>        | 192.8 | B <sub>2g</sub>       | 196.5 | B <sub>2g</sub>       | 197.6 | B <sub>2g</sub>       | 197.8 | B <sub>2g</sub>       | 198.2 | B <sub>2g</sub>       | 198.7 | 213.4                | B <sub>2g</sub>                     |                       |       |                       |       |                       |       |                       |       |  |  |  |  |
| B <sub>1g</sub>                                  | 212.0 | B <sub>1g</sub>       | 212.0 | A <sub>g</sub>                                   | 210.0 | A <sub>g</sub>        | 197.9 | A <sub>g</sub>        | 210.2 | A <sub>g</sub>        | 210.5 | A <sub>g</sub>        | 210.4 | A <sub>g</sub>        | 210.2 | A <sub>g</sub>        | 210.0 | 226.4                | A <sub>g</sub>                      |                       |       |                       |       |                       |       |                       |       |  |  |  |  |
| B <sub>2g</sub>                                  | 226.1 | B <sub>2g</sub>       | 226.3 | B <sub>2g</sub>                                  | 226.2 | B <sub>2g</sub>       | 210.5 | B <sub>2g</sub>       | 225.7 | B <sub>2g</sub>       | 226.3 | B <sub>2g</sub>       | 226.4 | B <sub>2g</sub>       | 225.6 | B <sub>2g</sub>       | 225.3 | 246.8                | B <sub>2g</sub>                     |                       |       |                       |       |                       |       |                       |       |  |  |  |  |

**Table S12.** Calculated wavenumbers (cm<sup>-1</sup>) of “silent” modes (type of modes is A<sub>u</sub>) for EuLnCuSe<sub>3</sub>.

| <i>Pnma</i> space group                          |                       |                                                  |                       |                       |                       |                       |                       |                       |                      | <i>Cmcm</i> space group             |                       |                       |                       |
|--------------------------------------------------|-----------------------|--------------------------------------------------|-----------------------|-----------------------|-----------------------|-----------------------|-----------------------|-----------------------|----------------------|-------------------------------------|-----------------------|-----------------------|-----------------------|
| Ba <sub>2</sub> MnS <sub>3</sub> structural type |                       | Eu <sub>2</sub> CuS <sub>3</sub> structural type |                       |                       |                       |                       |                       |                       |                      | KZrCuS <sub>3</sub> structural type |                       |                       |                       |
| EuLaCuSe <sub>3</sub>                            | EuCeCuSe <sub>3</sub> | EuPrCuSe <sub>3</sub>                            | EuNdCuSe <sub>3</sub> | EuSmCuSe <sub>3</sub> | EuGdCuSe <sub>3</sub> | EuTbCuSe <sub>3</sub> | EuDyCuSe <sub>3</sub> | EuHoCuSe <sub>3</sub> | EuYCuSe <sub>3</sub> | EuErCuSe <sub>3</sub>               | EuTmCuSe <sub>3</sub> | EuYbCuSe <sub>3</sub> | EuLuCuSe <sub>3</sub> |
| 39.5                                             | 40.0                  | 60.9                                             | 60.4                  | 61.1                  | 60.1                  | 60.7                  | 60.4                  | 60.6                  | 65.9                 | 60.5                                | 60.2                  | 59.4                  | 59.3                  |
| 85.2                                             | 86.2                  | 69.3                                             | 68.2                  | 70.5                  | 66.4                  | 68.0                  | 68.2                  | 69.9                  | 73.6                 | 144.2                               | 145.2                 | 144.1                 | 144.0                 |
| 97.4                                             | 97.2                  | 91.2                                             | 88.4                  | 95.6                  | 91.4                  | 92.7                  | 93.4                  | 97.8                  | 92.3                 |                                     |                       |                       |                       |
| 125.8                                            | 126.8                 | 143.9                                            | 143.3                 | 148.8                 | 142.8                 | 144.9                 | 147.7                 | 146.9                 | 148.3                |                                     |                       |                       |                       |
| 154.6                                            | 155.3                 | 155.7                                            | 154.3                 | 158.7                 | 157.6                 | 150.6                 | 157.1                 | 149.5                 | 167.1                |                                     |                       |                       |                       |
| 207.2                                            | 206.8                 | 174.4                                            | 169.8                 | 185.6                 | 182.4                 | 187.7                 | 190.2                 | 194.4                 | 194.3                |                                     |                       |                       |                       |

**Table S13.** Calculated IR wavenumbers (cm<sup>-1</sup>) and mode intensities (km mol<sup>-1</sup>) for EuLnCuSe<sub>3</sub> (Ln = La, Tb, Y and Tm).

| <i>Pnma</i> space group                          |            |           |                                                  |            |           |                      |            |           | <i>Cmcm</i> space group             |            |           |
|--------------------------------------------------|------------|-----------|--------------------------------------------------|------------|-----------|----------------------|------------|-----------|-------------------------------------|------------|-----------|
| Ba <sub>2</sub> MnS <sub>3</sub> structural type |            |           | Eu <sub>2</sub> CuS <sub>3</sub> structural type |            |           |                      |            |           | KZrCuS <sub>3</sub> structural type |            |           |
| EuLaCuSe <sub>3</sub>                            |            |           | EuTbCuSe <sub>3</sub>                            |            |           | EuYCuSe <sub>3</sub> |            |           | EuTmCuSe <sub>3</sub>               |            |           |
| Mode                                             | Wavenumber | Intensity | Mode                                             | Wavenumber | Intensity | Mode                 | Wavenumber | Intensity | Mode                                | Wavenumber | Intensity |
| B <sub>1u</sub>                                  | 45.9       | 0         | B <sub>3u</sub>                                  | 49.4       | 28.75     | B <sub>3u</sub>      | 52.2       | 55        | B <sub>1u</sub>                     | 46.3       | 19.47     |
| B <sub>2u</sub>                                  | 59.9       | 4.03      | B <sub>1u</sub>                                  | 59.7       | 1.47      | B <sub>1u</sub>      | 58.0       | 0.64      | B <sub>2u</sub>                     | 81.3       | 5.38      |
| B <sub>3u</sub>                                  | 61.9       | 5.02      | B <sub>3u</sub>                                  | 76.0       | 0.89      | B <sub>3u</sub>      | 74.6       | 0.88      | B <sub>1u</sub>                     | 90.7       | 4.1       |
| B <sub>3u</sub>                                  | 79.8       | 5.91      | B <sub>2u</sub>                                  | 83.3       | 9.68      | B <sub>1u</sub>      | 83.9       | 3.48      | B <sub>1u</sub>                     | 94.2       | 118.11    |
| B <sub>3u</sub>                                  | 90.5       | 0.01      | B <sub>1u</sub>                                  | 84.8       | 5.08      | B <sub>2u</sub>      | 90.6       | 6.29      | B <sub>2u</sub>                     | 99.8       | 20.79     |
| B <sub>1u</sub>                                  | 90.6       | 215.62    | B <sub>3u</sub>                                  | 92.5       | 70.56     | B <sub>2u</sub>      | 98.7       | 34.25     | B <sub>3u</sub>                     | 100.5      | 144.36    |
| B <sub>3u</sub>                                  | 92.6       | 22.14     | B <sub>3u</sub>                                  | 95.4       | 185.92    | B <sub>3u</sub>      | 99.3       | 0.02      | B <sub>3u</sub>                     | 108.9      | 80.6      |
| B <sub>2u</sub>                                  | 97.3       | 48.26     | B <sub>2u</sub>                                  | 97.6       | 35        | B <sub>1u</sub>      | 101.0      | 366.34    | B <sub>3u</sub>                     | 131.1      | 2.11      |
| B <sub>1u</sub>                                  | 103.2      | 3.38      | B <sub>1u</sub>                                  | 100.3      | 288.5     | B <sub>3u</sub>      | 101.7      | 228.64    | B <sub>2u</sub>                     | 149.0      | 632.71    |
| B <sub>1u</sub>                                  | 108.3      | 16.26     | B <sub>3u</sub>                                  | 105.4      | 2.48      | B <sub>3u</sub>      | 108.3      | 3.88      | B <sub>1u</sub>                     | 153.7      | 477.11    |
| B <sub>3u</sub>                                  | 115.6      | 58.76     | B <sub>1u</sub>                                  | 110.6      | 167.51    | B <sub>1u</sub>      | 117.6      | 161.75    | B <sub>3u</sub>                     | 175.3      | 62.24     |
| B <sub>1u</sub>                                  | 125.6      | 136.94    | B <sub>1u</sub>                                  | 131.8      | 6.15      | B <sub>2u</sub>      | 143.7      | 8.64      | B <sub>1u</sub>                     | 180.6      | 81.56     |
| B <sub>1u</sub>                                  | 133.6      | 25.96     | B <sub>2u</sub>                                  | 142.6      | 133.03    | B <sub>1u</sub>      | 153.3      | 0.00      | B <sub>3u</sub>                     | 190.2      | 207.14    |
| B <sub>3u</sub>                                  | 135.5      | 947.69    | B <sub>2u</sub>                                  | 152.0      | 1224.28   | B <sub>1u</sub>      | 158.0      | 0.46      | B <sub>1u</sub>                     | 197.0      | 23.15     |
| B <sub>2u</sub>                                  | 139.1      | 198.42    | B <sub>3u</sub>                                  | 155.4      | 980.84    | B <sub>3u</sub>      | 169.8      | 985.96    | B <sub>2u</sub>                     | 197.2      | 64.19     |
| B <sub>3u</sub>                                  | 145.3      | 185.9     | B <sub>1u</sub>                                  | 156.3      | 0         | B <sub>2u</sub>      | 170.1      | 1534.75   | B <sub>3u</sub>                     | 206.0      | 33.88     |
| B <sub>2u</sub>                                  | 155.4      | 885.36    | B <sub>1u</sub>                                  | 173.5      | 122.11    | B <sub>1u</sub>      | 175.0      | 55.72     |                                     |            |           |
| B <sub>1u</sub>                                  | 159.6      | 500.57    | B <sub>1u</sub>                                  | 179.5      | 36.56     | B <sub>1u</sub>      | 181.1      | 2.19      |                                     |            |           |
| B <sub>3u</sub>                                  | 167.5      | 326.8     | B <sub>3u</sub>                                  | 180.5      | 136.57    | B <sub>3u</sub>      | 182.3      | 15.50     |                                     |            |           |
| B <sub>1u</sub>                                  | 167.6      | 17.32     | B <sub>3u</sub>                                  | 181.8      | 12.84     | B <sub>3u</sub>      | 187.2      | 0.24      |                                     |            |           |
| B <sub>3u</sub>                                  | 174.6      | 48.62     | B <sub>3u</sub>                                  | 186.8      | 45.73     | B <sub>1u</sub>      | 192.9      | 2.54      |                                     |            |           |
| B <sub>1u</sub>                                  | 181.5      | 685.56    | B <sub>2u</sub>                                  | 188.4      | 150.83    | B <sub>3u</sub>      | 193.7      | 89.40     |                                     |            |           |
| B <sub>1u</sub>                                  | 186.7      | 9.36      | B <sub>1u</sub>                                  | 193.5      | 169.57    | B <sub>2u</sub>      | 195.0      | 189.98    |                                     |            |           |
| B <sub>3u</sub>                                  | 197.8      | 57.61     | B <sub>3u</sub>                                  | 195.9      | 34.1      | B <sub>3u</sub>      | 198.2      | 343.61    |                                     |            |           |
| B <sub>2u</sub>                                  | 207.4      | 397.55    | B <sub>1u</sub>                                  | 198.3      | 261.03    | B <sub>3u</sub>      | 211.7      | 120.11    |                                     |            |           |
| B <sub>1u</sub>                                  | 208.2      | 87.86     | B <sub>3u</sub>                                  | 198.9      | 25.82     | B <sub>1u</sub>      | 218.3      | 484.18    |                                     |            |           |
| B <sub>3u</sub>                                  | 223.5      | 4.92      | B <sub>1u</sub>                                  | 206.7      | 23.38     | B <sub>1u</sub>      | 228.7      | 89.37     |                                     |            |           |



**Table S14.** Calculated Raman wavenumbers (cm<sup>-1</sup>) and mode intensities (a.u.) for EuLnCuSe<sub>3</sub> (Ln = La, Tb, Y and Tm).

| <i>Pnma</i> space group                                                   |            |           |                                                                           |            |           | <i>Cmcm</i> space group                                      |            |           |
|---------------------------------------------------------------------------|------------|-----------|---------------------------------------------------------------------------|------------|-----------|--------------------------------------------------------------|------------|-----------|
| Ba <sub>2</sub> MnS <sub>3</sub> structural type<br>EuLaCuSe <sub>3</sub> |            |           | Eu <sub>2</sub> CuS <sub>3</sub> structural type<br>EuTbCuSe <sub>3</sub> |            |           | KZrCuS <sub>3</sub> structural type<br>EuTmCuSe <sub>3</sub> |            |           |
| Mode                                                                      | Wavenumber | Intensity | Mode                                                                      | Wavenumber | Intensity | Mode                                                         | Wavenumber | Intensity |
| B <sub>1g</sub>                                                           | 41.2       | 315       | A <sub>g</sub>                                                            | 18.9       | 627       | B <sub>2g</sub>                                              | 63.4       | 736       |
| A <sub>g</sub>                                                            | 42.8       | 147       | A <sub>g</sub>                                                            | 45.3       | 54        | B <sub>1g</sub>                                              | 64.1       | 535       |
| A <sub>g</sub>                                                            | 63.9       | 264       | B <sub>1g</sub>                                                           | 51.2       | 10        | A <sub>g</sub>                                               | 67.5       | 853       |
| B <sub>3g</sub>                                                           | 66.9       | 716       | B <sub>2g</sub>                                                           | 61.3       | 2         | B <sub>2g</sub>                                              | 95.6       | 313       |
| B <sub>1g</sub>                                                           | 67.2       | 6         | B <sub>3g</sub>                                                           | 61.4       | 322       | B <sub>1g</sub>                                              | 100.3      | 211       |
| B <sub>2g</sub>                                                           | 69.1       | 210       | B <sub>1g</sub>                                                           | 65.9       | 5         | A <sub>g</sub>                                               | 105.1      | 251       |
| B <sub>2g</sub>                                                           | 75.7       | 231       | B <sub>3g</sub>                                                           | 66.9       | 396       | B <sub>3g</sub>                                              | 146.7      | 93        |
| A <sub>g</sub>                                                            | 81.0       | 575       | B <sub>2g</sub>                                                           | 67.4       | 887       | B <sub>1g</sub>                                              | 150.5      | 42        |
| B <sub>2g</sub>                                                           | 82.0       | 2         | A <sub>g</sub>                                                            | 68.8       | 917       | B <sub>2g</sub>                                              | 158.7      | 9         |
| B <sub>3g</sub>                                                           | 85.0       | 139       | B <sub>2g</sub>                                                           | 76.8       | 2         | A <sub>g</sub>                                               | 173.6      | 174       |
| A <sub>g</sub>                                                            | 85.8       | 161       | A <sub>g</sub>                                                            | 96.3       | 13        | A <sub>g</sub>                                               | 185.0      | 124       |
| B <sub>3g</sub>                                                           | 101.0      | 41        | B <sub>2g</sub>                                                           | 96.6       | 341       | B <sub>2g</sub>                                              | 193.5      | 169       |
| B <sub>1g</sub>                                                           | 102.5      | 1000      | B <sub>3g</sub>                                                           | 98.3       | 178       | B <sub>1g</sub>                                              | 195.8      | 0         |
| B <sub>2g</sub>                                                           | 104.7      | 48        | B <sub>1g</sub>                                                           | 100.2      | 22        | A <sub>g</sub>                                               | 196.2      | 1000      |
| A <sub>g</sub>                                                            | 118.0      | 259       | A <sub>g</sub>                                                            | 102.8      | 186       | B <sub>2g</sub>                                              | 199.3      | 159       |
| B <sub>2g</sub>                                                           | 122.9      | 19        | A <sub>g</sub>                                                            | 109.1      | 132       |                                                              |            |           |
| B <sub>3g</sub>                                                           | 126.1      | 9         | B <sub>2g</sub>                                                           | 109.5      | 1         |                                                              |            |           |
| B <sub>2g</sub>                                                           | 127.7      | 76        | B <sub>2g</sub>                                                           | 142.7      | 3         |                                                              |            |           |
| A <sub>g</sub>                                                            | 127.8      | 860       | B <sub>1g</sub>                                                           | 146.9      | 93        |                                                              |            |           |
| B <sub>1g</sub>                                                           | 140.1      | 8         | B <sub>3g</sub>                                                           | 148.8      | 7         |                                                              |            |           |
| B <sub>2g</sub>                                                           | 142.6      | 5         | B <sub>3g</sub>                                                           | 153.5      | 21        |                                                              |            |           |
| A <sub>g</sub>                                                            | 145.5      | 74        | B <sub>1g</sub>                                                           | 154.1      | 28        |                                                              |            |           |
| A <sub>g</sub>                                                            | 149.0      | 320       | A <sub>g</sub>                                                            | 157.2      | 16        |                                                              |            |           |
| B <sub>2g</sub>                                                           | 156.5      | 0         | B <sub>2g</sub>                                                           | 159.0      | 18        |                                                              |            |           |
| B <sub>1g</sub>                                                           | 161.1      | 75        | A <sub>g</sub>                                                            | 171.6      | 304       |                                                              |            |           |
| B <sub>3g</sub>                                                           | 161.1      | 653       | B <sub>2g</sub>                                                           | 176.6      | 4         |                                                              |            |           |
| A <sub>g</sub>                                                            | 164.2      | 922       | A <sub>g</sub>                                                            | 182.7      | 83        |                                                              |            |           |
| B <sub>2g</sub>                                                           | 169.5      | 68        | A <sub>g</sub>                                                            | 184.2      | 141       |                                                              |            |           |
| A <sub>g</sub>                                                            | 174.6      | 826       | B <sub>3g</sub>                                                           | 187.2      | 1         |                                                              |            |           |
| B <sub>2g</sub>                                                           | 185.2      | 25        | B <sub>2g</sub>                                                           | 187.2      | 4         |                                                              |            |           |
| A <sub>g</sub>                                                            | 189.2      | 389       | B <sub>1g</sub>                                                           | 189.3      | 0         |                                                              |            |           |
| B <sub>2g</sub>                                                           | 197.8      | 30        | B <sub>2g</sub>                                                           | 192.7      | 234       |                                                              |            |           |
| A <sub>g</sub>                                                            | 208.7      | 373       | A <sub>g</sub>                                                            | 197.2      | 1000      |                                                              |            |           |
| B <sub>3g</sub>                                                           | 211.7      | 115       | B <sub>2g</sub>                                                           | 197.8      | 104       |                                                              |            |           |
| B <sub>1g</sub>                                                           | 212.0      | 66        | A <sub>g</sub>                                                            | 210.4      | 89        |                                                              |            |           |
| B <sub>2g</sub>                                                           | 226.1      | 30        | B <sub>2g</sub>                                                           | 226.4      | 2         |                                                              |            |           |

**Table S15.** Wavenumbers (cm<sup>-1</sup>) and types of the phonon modes at the  $\Gamma$ -point for EuTbCuSe<sub>3</sub> and EuTmCuSe<sub>3</sub>.

| <i>Pnma</i> space group                          |                 |                 |                    |                                                                                   | <i>Cmcm</i> space group             |                 |                 |                    |                                                                         |
|--------------------------------------------------|-----------------|-----------------|--------------------|-----------------------------------------------------------------------------------|-------------------------------------|-----------------|-----------------|--------------------|-------------------------------------------------------------------------|
| Eu <sub>2</sub> CuS <sub>3</sub> structural type |                 |                 |                    |                                                                                   | KZrCuS <sub>3</sub> structural type |                 |                 |                    |                                                                         |
| EuTbCuSe <sub>3</sub>                            |                 |                 |                    |                                                                                   | EuTmCuSe <sub>3</sub>               |                 |                 |                    |                                                                         |
| Wavenumber                                       | Mode            | IR <sup>1</sup> | Raman <sup>1</sup> | Involved ions <sup>2,3</sup>                                                      | Wavenumber                          | Mode            | IR <sup>1</sup> | Raman <sup>1</sup> | Involved ions <sup>2,4</sup>                                            |
| 18.9                                             | A <sub>g</sub>  | I               | A                  | Eu <sup>S</sup> , Tb <sup>S</sup> , Cu, Se1 <sup>S</sup> , Se2 <sup>S</sup> , Se3 | 46.3                                | B <sub>1u</sub> | A               | I                  | Eu <sup>S</sup> , Tm <sup>S</sup> , Cu, Se1 <sup>S</sup> , Se2          |
| 45.3                                             | A <sub>g</sub>  | I               | A                  | Eu, Tb <sup>S</sup> , Cu, Se1, Se2, Se3 <sup>S</sup>                              | 60.1                                | A <sub>u</sub>  | I               | I                  | Tm <sup>S</sup> , Se1 <sup>S</sup>                                      |
| 49.4                                             | B <sub>3u</sub> | A               | I                  | Eu <sup>S</sup> , Tb <sup>S</sup> , Cu, Se1, Se2, Se3                             | 64.0                                | B <sub>2g</sub> | I               | A                  | Eu <sup>S</sup> , Cu, Se1                                               |
| 50.5                                             | B <sub>1g</sub> | I               | A                  | Eu <sup>W</sup> , Tb <sup>S</sup> , Cu, Se1, Se2, Se3                             | 64.1                                | B <sub>1g</sub> | I               | A                  | Eu <sup>S</sup> , Cu <sup>S</sup> , Se1, Se2 <sup>S</sup>               |
| 59.7                                             | B <sub>1u</sub> | A               | I                  | Eu, Tb, Cu, Se2, Se3                                                              | 67.5                                | A <sub>g</sub>  | I               | A                  | Eu <sup>S</sup> , Cu <sup>S</sup> , Se1, Se2 <sup>S</sup>               |
| 60.8                                             | A <sub>u</sub>  | I               | I                  | Eu <sup>W</sup> , Tb <sup>S</sup> , Cu <sup>W</sup> , Se1, Se2, Se3 <sup>W</sup>  | 81.3                                | B <sub>2u</sub> | A               | I                  | Eu <sup>S</sup> , Tm <sup>S</sup> , Cu <sup>S</sup> , Se1, Se2          |
| 61.3                                             | B <sub>2g</sub> | I               | A                  | Eu <sup>S</sup> , Cu <sup>W</sup> , Se1 <sup>W</sup> , Se2 <sup>W</sup>           | 90.6                                | B <sub>1u</sub> | A               | I                  | Eu, Tm <sup>S</sup> , Cu <sup>S</sup> , Se1 <sup>S</sup> , Se2          |
| 62.5                                             | B <sub>3g</sub> | I               | A                  | Eu <sup>S</sup> , Tb, Cu <sup>W</sup> , Se1 <sup>W</sup> , Se2 <sup>W</sup> , Se3 | 94.2                                | B <sub>1u</sub> | A               | I                  | Eu, Tm, Cu <sup>S</sup> , Se1, Se2 <sup>W</sup>                         |
| 67.4                                             | B <sub>2g</sub> | I               | A                  | Eu <sup>S</sup> , Cu <sup>S</sup> , Se3                                           | 95.6                                | B <sub>2g</sub> | I               | A                  | Eu, Cu <sup>S</sup> , Se1 <sup>S</sup>                                  |
| 67.8                                             | B <sub>3g</sub> | I               | A                  | Eu, Tb <sup>S</sup> , Cu <sup>W</sup> , Se1, Se2 <sup>W</sup> , Se3 <sup>W</sup>  | 99.8                                | B <sub>2u</sub> | A               | I                  | Eu <sup>S</sup> , Cu <sup>S</sup> , Se2                                 |
| 68.8                                             | A <sub>g</sub>  | I               | A                  | Eu <sup>S</sup> , Tb, Cu, Se2, Se3                                                | 100.3                               | B <sub>1g</sub> | I               | A                  | Eu <sup>S</sup> , Cu <sup>S</sup> , Se1 <sup>W</sup> , Se2 <sup>S</sup> |
| 69.5                                             | B <sub>1g</sub> | I               | A                  | Eu <sup>S</sup> , Cu <sup>W</sup> , Se1, Se2                                      | 100.6                               | B <sub>3u</sub> | A               | I                  | Eu <sup>S</sup> , Tm <sup>W</sup> , Cu <sup>S</sup> , Se1, Se2          |
| 70.4                                             | A <sub>u</sub>  | I               | I                  | Eu <sup>S</sup> , Cu <sup>S</sup> , Se1 <sup>W</sup> , Se2 <sup>W</sup> , Se3     | 105.1                               | A <sub>g</sub>  | I               | A                  | Eu <sup>S</sup> , Cu <sup>S</sup> , Se1, Se2                            |
| 76.0                                             | B <sub>3u</sub> | A               | I                  | Eu, Cu <sup>S</sup> , Se1, Se2, Se3                                               | 108.8                               | B <sub>3u</sub> | A               | I                  | Eu <sup>S</sup> , Tm, Cu, Se1                                           |
| 76.7                                             | B <sub>2g</sub> | I               | A                  | Tb, Cu, Se1, Se2, Se3                                                             | 131.2                               | B <sub>3u</sub> | A               | I                  | Tm <sup>S</sup> , Cu, Se1 <sup>W</sup> , Se2 <sup>W</sup>               |
| 84.8                                             | B <sub>1u</sub> | A               | I                  | Eu, Tb, Cu, Se1 <sup>W</sup> , Se2 <sup>W</sup> , Se3                             | 143.9                               | A <sub>u</sub>  | I               | I                  | Tm, Se1 <sup>S</sup>                                                    |
| 85.6                                             | B <sub>2u</sub> | A               | I                  | Eu <sup>W</sup> , Cu <sup>S</sup> , Se1, Se2 <sup>S</sup>                         | 145.6                               | B <sub>3g</sub> | I               | A                  | Se1 <sup>S</sup>                                                        |
| 92.5                                             | B <sub>3u</sub> | A               | I                  | Eu, Cu <sup>S</sup> , Se1 <sup>W</sup> , Se3                                      | 147.7                               | B <sub>2u</sub> | A               | I                  | Eu <sup>W</sup> , Tm, Se1 <sup>S</sup>                                  |
| 95.4                                             | B <sub>3u</sub> | A               | I                  | Tb, Cu <sup>S</sup> , Se1, Se2, Se3 <sup>W</sup>                                  | 149.5                               | B <sub>1g</sub> | I               | A                  | Eu <sup>W</sup> , Se1 <sup>S</sup>                                      |
| 96.3                                             | A <sub>g</sub>  | I               | A                  | Eu, Tb, Cu <sup>W</sup> , Se1, Se2                                                | 153.7                               | B <sub>1u</sub> | A               | I                  | Tm, Cu, Se1, Se2                                                        |
| 96.6                                             | B <sub>2g</sub> | I               | A                  | Eu, Cu <sup>S</sup> , Se3                                                         | 158.7                               | B <sub>2g</sub> | I               | A                  | Eu <sup>W</sup> , Cu, Se1 <sup>S</sup> , Se2                            |
| 97.8                                             | A <sub>u</sub>  | I               | I                  | Eu <sup>W</sup> , Tb, Cu <sup>S</sup> , Se1, Se2, Se3 <sup>W</sup>                | 173.6                               | A <sub>g</sub>  | I               | A                  | Eu <sup>W</sup> , Se1 <sup>S</sup> , Se2                                |
| 100.4                                            | B <sub>1u</sub> | A               | I                  | Eu <sup>W</sup> , Cu <sup>S</sup> , Se1, Se2                                      | 175.3                               | B <sub>3u</sub> | A               | I                  | Se1, Se2 <sup>S</sup>                                                   |
| 102.5                                            | A <sub>g</sub>  | I               | A                  | Eu, Cu <sup>S</sup> , Se3                                                         | 180.6                               | B <sub>1u</sub> | A               | I                  | Tm, Cu <sup>W</sup> , Se1, Se2 <sup>S</sup>                             |
| 103.2                                            | B <sub>2u</sub> | A               | I                  | Eu, Tb, Cu <sup>S</sup> , Se3                                                     | 185.0                               | A <sub>g</sub>  | I               | A                  | Cu <sup>S</sup> , Se1 <sup>W</sup> , Se2 <sup>S</sup>                   |
| 104.0                                            | B <sub>3g</sub> | I               | A                  | Eu, Tb <sup>W</sup> , Cu <sup>S</sup> , Se1, Se2 <sup>W</sup> , Se3 <sup>W</sup>  | 190.2                               | B <sub>3u</sub> | A               | I                  | Tm, Cu, Se1 <sup>S</sup>                                                |
| 105.2                                            | B <sub>1g</sub> | I               | A                  | Eu, Tb <sup>W</sup> , Cu, Se1 <sup>W</sup> , Se2, Se3 <sup>W</sup>                | 193.5                               | B <sub>2g</sub> | I               | A                  | Cu, Se1, Se2 <sup>S</sup>                                               |
| 105.4                                            | B <sub>3u</sub> | A               | I                  | Eu, Cu, Se1 <sup>W</sup> , Se2                                                    | 195.8                               | B <sub>1g</sub> | I               | A                  | Cu <sup>S</sup> , Se2 <sup>S</sup>                                      |
| 109.1                                            | A <sub>g</sub>  | I               | A                  | Eu <sup>W</sup> , Tb <sup>W</sup> , Cu <sup>S</sup> , Se1, Se2                    | 196.2                               | A <sub>g</sub>  | I               | A                  | Cu, Se1 <sup>S</sup> , Se2 <sup>W</sup>                                 |
| 109.6                                            | B <sub>2g</sub> | I               | A                  | Eu, Tb <sup>W</sup> , Cu, Se1, Se2 <sup>W</sup>                                   | 197.0                               | B <sub>1u</sub> | A               | I                  | Tm <sup>W</sup> , Cu <sup>S</sup> , Se1, Se2                            |
| 110.6                                            | B <sub>1u</sub> | A               | I                  | Eu, Tb, Cu, Se1 <sup>W</sup> , Se2 <sup>W</sup>                                   | 197.1                               | B <sub>2u</sub> | A               | I                  | Cu <sup>S</sup> , Se2 <sup>S</sup>                                      |
| 131.8                                            | B <sub>1u</sub> | A               | I                  | Tb, Cu, Se1 <sup>W</sup> , Se3 <sup>W</sup>                                       | 199.3                               | B <sub>2g</sub> | I               | A                  | Cu <sup>S</sup> , Se1, Se2 <sup>W</sup>                                 |
| 142.7                                            | B <sub>2g</sub> | I               | A                  | Tb <sup>W</sup> , Se1 <sup>S</sup> , Se2 <sup>W</sup>                             | 206.0                               | B <sub>3u</sub> | A               | I                  | Tm <sup>W</sup> , Cu <sup>S</sup> , Se1, Se2                            |
| 146.3                                            | B <sub>2u</sub> | A               | I                  | Tb <sup>W</sup> , Se1 <sup>S</sup>                                                |                                     |                 |                 |                    |                                                                         |
| 150.0                                            | A <sub>u</sub>  | I               | I                  | Eu <sup>W</sup> , Tb, Cu <sup>W</sup> , Se1 <sup>W</sup> , Se2 <sup>W</sup>       |                                     |                 |                 |                    |                                                                         |
| 150.3                                            | B <sub>1g</sub> | I               | A                  | Tb <sup>W</sup> , Se1 <sup>S</sup> , Se2 <sup>W</sup>                             |                                     |                 |                 |                    |                                                                         |
| 151.8                                            | A <sub>u</sub>  | I               | I                  | Tb <sup>W</sup> , Se1 <sup>S</sup>                                                |                                     |                 |                 |                    |                                                                         |
| 153.0                                            | B <sub>3g</sub> | I               | A                  | Tb, Cu, Se1, Se2, Se3 <sup>W</sup>                                                |                                     |                 |                 |                    |                                                                         |
| 154.4                                            | B <sub>2u</sub> | A               | I                  | Cu <sup>W</sup> , Se1, Se2, Se3                                                   |                                     |                 |                 |                    |                                                                         |
| 155.1                                            | B <sub>3g</sub> | I               | A                  | Tb <sup>W</sup> , Cu, Se1, Se2, Se3 <sup>W</sup>                                  |                                     |                 |                 |                    |                                                                         |
| 155.4                                            | B <sub>3u</sub> | A               | I                  | Tb <sup>W</sup> , Se2 <sup>S</sup>                                                |                                     |                 |                 |                    |                                                                         |
| 156.3                                            | B <sub>1u</sub> | A               | I                  | Tb <sup>W</sup> , Se2 <sup>S</sup>                                                |                                     |                 |                 |                    |                                                                         |
| 156.9                                            | B <sub>1g</sub> | I               | A                  | Cu <sup>W</sup> , Se1, Se2, Se3                                                   |                                     |                 |                 |                    |                                                                         |
| 157.2                                            | A <sub>g</sub>  | I               | A                  | Tb <sup>W</sup> , Se2 <sup>S</sup>                                                |                                     |                 |                 |                    |                                                                         |
| 159.1                                            | B <sub>2g</sub> | I               | A                  | Tb <sup>W</sup> , Se2 <sup>S</sup>                                                |                                     |                 |                 |                    |                                                                         |
| 171.5                                            | A <sub>g</sub>  | I               | A                  | Se1, Se2, Se3                                                                     |                                     |                 |                 |                    |                                                                         |
| 173.5                                            | B <sub>1u</sub> | A               | I                  | Se1, Se2 <sup>W</sup> , Se3                                                       |                                     |                 |                 |                    |                                                                         |
| 176.6                                            | B <sub>2g</sub> | I               | A                  | Tb <sup>W</sup> , Se1 <sup>W</sup> , Se2 <sup>W</sup> , Se3                       |                                     |                 |                 |                    |                                                                         |
| 179.5                                            | B <sub>1u</sub> | A               | I                  | Cu, Se1, Se2 <sup>W</sup> , Se3                                                   |                                     |                 |                 |                    |                                                                         |
| 180.6                                            | B <sub>3u</sub> | A               | I                  | Tb <sup>W</sup> , Cu, Se1 <sup>W</sup> , Se2, Se3                                 |                                     |                 |                 |                    |                                                                         |
| 181.8                                            | B <sub>3u</sub> | A               | I                  | Cu <sup>W</sup> , Se1, Se2, Se3                                                   |                                     |                 |                 |                    |                                                                         |
| 182.7                                            | A <sub>g</sub>  | I               | A                  | Cu, Se3 <sup>S</sup>                                                              |                                     |                 |                 |                    |                                                                         |
| 184.1                                            | A <sub>g</sub>  | I               | A                  | Tb <sup>W</sup> , Cu <sup>W</sup> , Se1 <sup>W</sup> , Se2 <sup>W</sup> , Se3     |                                     |                 |                 |                    |                                                                         |
| 186.9                                            | B <sub>3u</sub> | A               | I                  | Cu, Se3 <sup>S</sup>                                                              |                                     |                 |                 |                    |                                                                         |
| 187.2                                            | B <sub>2g</sub> | I               | A                  | Cu, Se2, Se3 <sup>S</sup>                                                         |                                     |                 |                 |                    |                                                                         |
| 192.7                                            | B <sub>2g</sub> | I               | A                  | Cu, Se1 <sup>W</sup> , Se2 <sup>W</sup> , Se3                                     |                                     |                 |                 |                    |                                                                         |
| 193.5                                            | B <sub>1u</sub> | A               | I                  | Cu, Se3 <sup>S</sup>                                                              |                                     |                 |                 |                    |                                                                         |

|       |                 |   |   |                                                                 |
|-------|-----------------|---|---|-----------------------------------------------------------------|
| 194.3 | B <sub>3g</sub> | I | A | Cu, Se1 <sup>W</sup> , Se3                                      |
| 194.7 | A <sub>u</sub>  | I | I | Tb <sup>W</sup> , Cu, Se1 <sup>W</sup> , Se2                    |
| 195.3 | B <sub>2u</sub> | A | I | Cu <sup>W</sup> , Se2 <sup>W</sup> , Se3 <sup>S</sup>           |
| 195.9 | B <sub>3u</sub> | A | I | Tb <sup>W</sup> , Cu <sup>W</sup> , Se1, Se3                    |
| 196.1 | B <sub>1g</sub> | I | A | Eu <sup>W</sup> , Cu <sup>W</sup> , Se1, Se2 <sup>W</sup> , Se3 |
| 197.1 | A <sub>g</sub>  | I | A | Cu, Se1, Se2, Se3 <sup>W</sup>                                  |
| 197.8 | B <sub>2g</sub> | I | A | Cu, Se1, Se2, Se3 <sup>W</sup>                                  |
| 198.3 | B <sub>1u</sub> | A | I | Tb <sup>W</sup> , Cu, Se2, Se3 <sup>W</sup>                     |
| 198.9 | B <sub>3u</sub> | A | I | Cu, Se1 <sup>W</sup> , Se2                                      |
| 206.7 | B <sub>1u</sub> | A | I | Tb <sup>W</sup> , Cu, Se1, Se2 <sup>W</sup> , Se3 <sup>W</sup>  |
| 210.4 | A <sub>g</sub>  | I | A | Tb <sup>W</sup> , Cu, Se1 <sup>W</sup> , Se2, Se3 <sup>W</sup>  |
| 226.3 | B <sub>2g</sub> | I | A | Tb <sup>W</sup> , Cu, Se1 <sup>W</sup> , Se2, Se3 <sup>W</sup>  |

<sup>1</sup> A = active mode, I = inactive mode.

<sup>2</sup> Superscripts "S" and "W" denote strong and weak ion displacements in the mode, respectively. If the displacement is 0.02–0.03 Å, it is denoted as "S"; if the displacement is 0.005–0.01 Å, it is denoted as "W"; if the displacement is <0.005 Å, the ion is omitted from consideration.

<sup>3</sup> The maximum displacement of 0.03 Å is for the Eu ion in the mode at 18.9 cm<sup>-1</sup>.

<sup>4</sup> The maximum displacement of 0.04 Å is for the Eu and Cu ions in the modes at 64.0 and 95.6 cm<sup>-1</sup>, respectively.

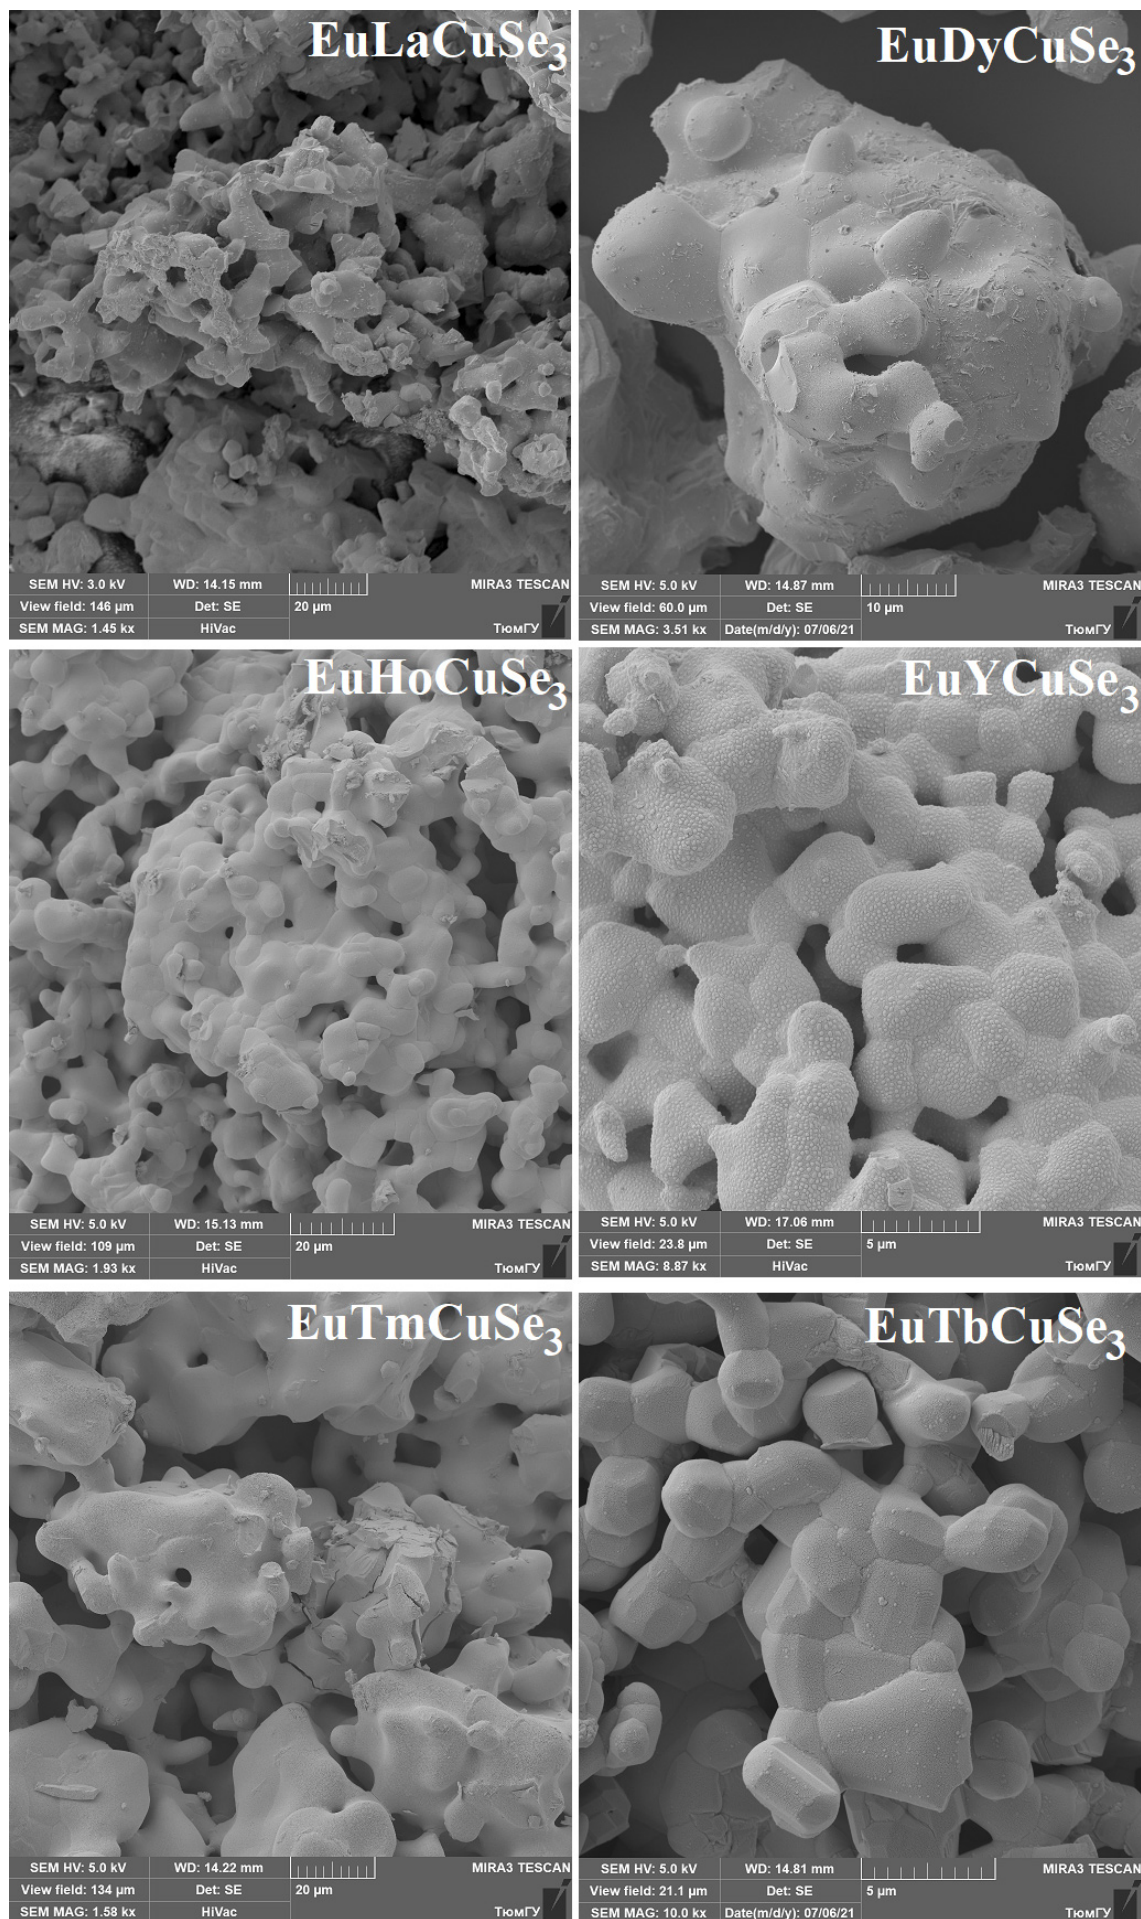

**Figure S1.** SEM images of EuLnCuSe<sub>3</sub>.

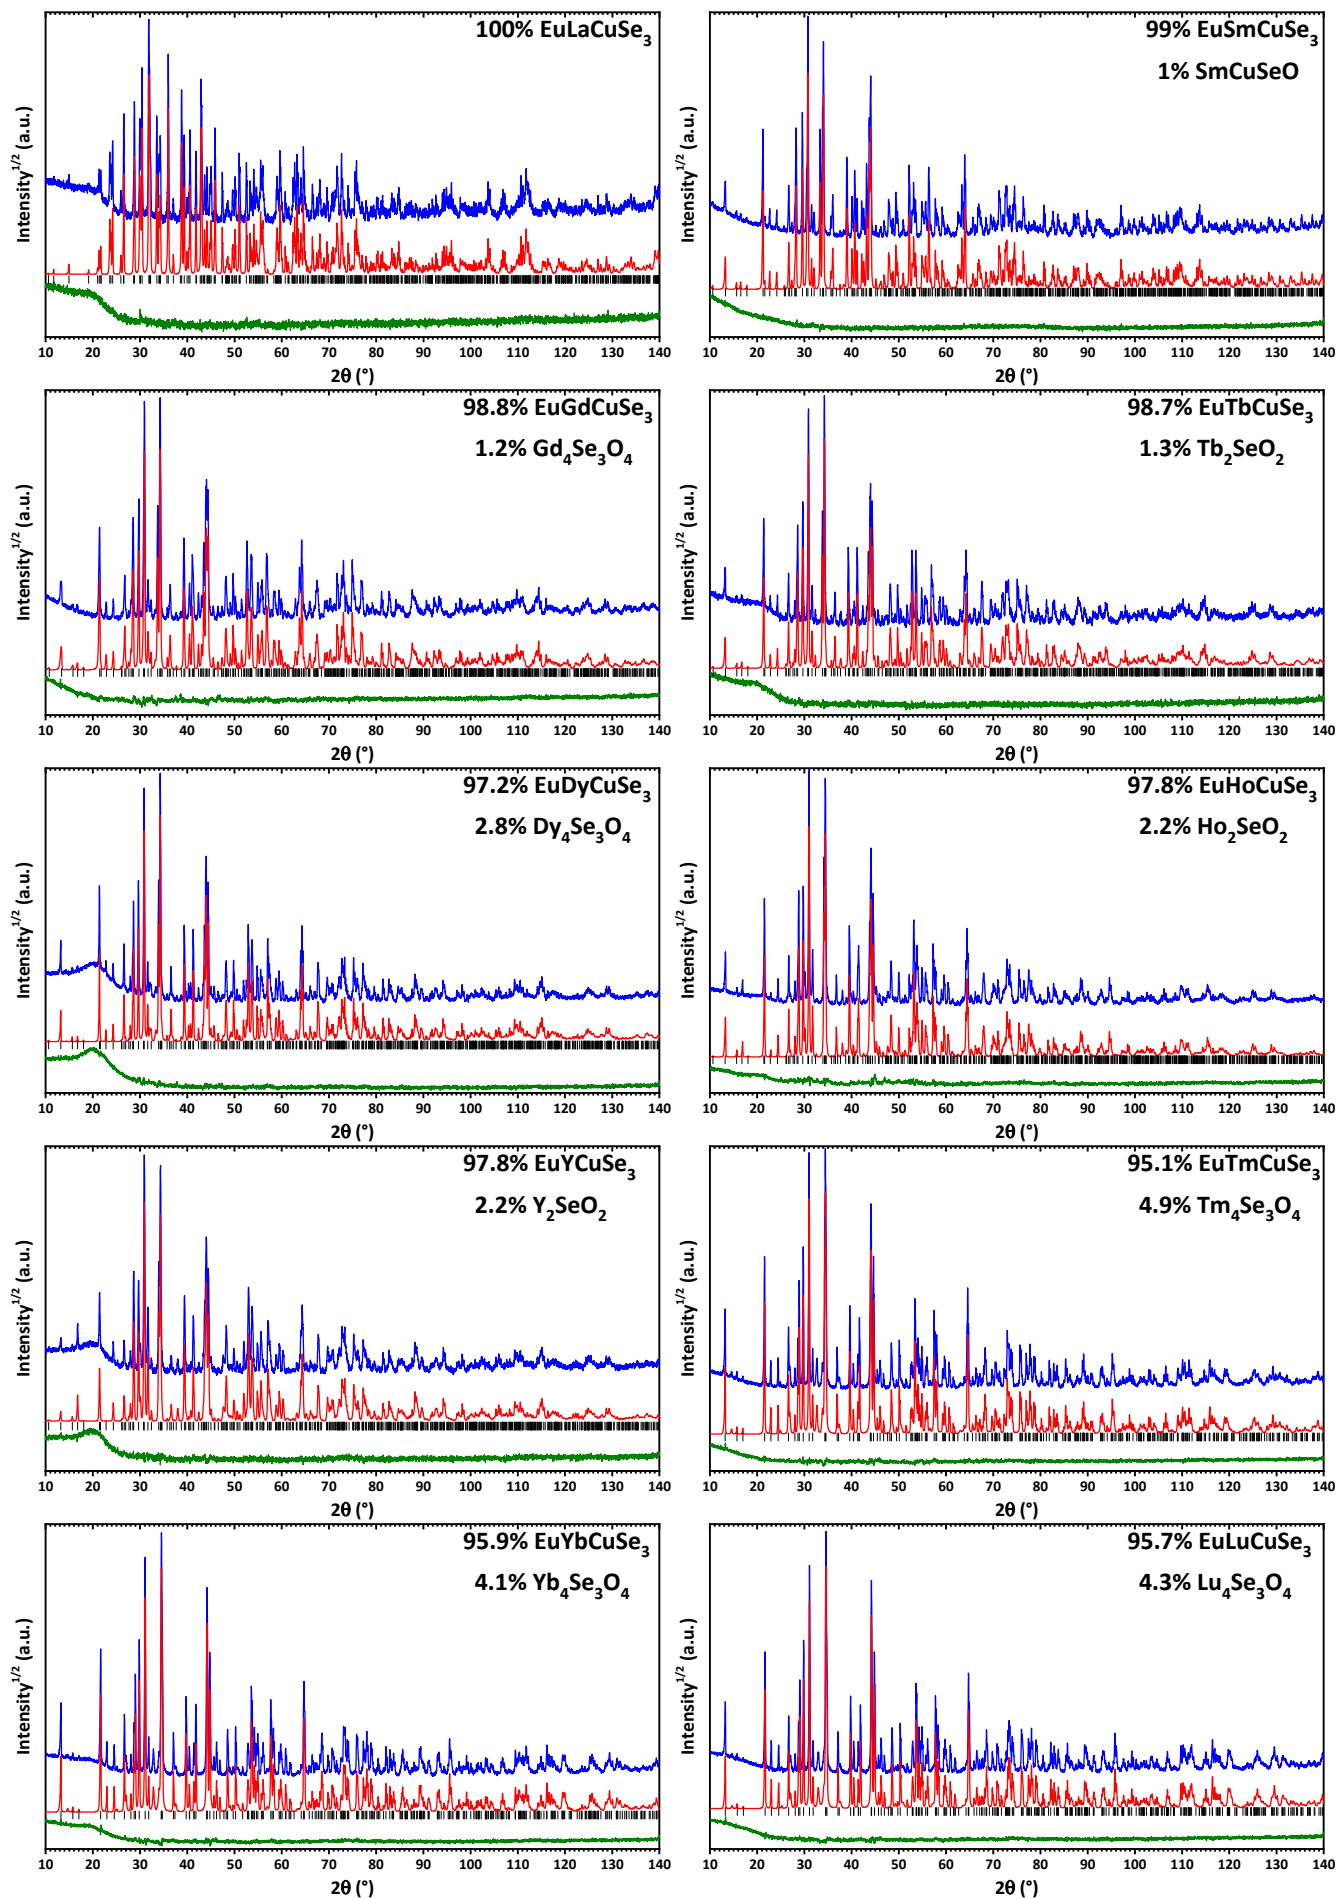

**Figure S2.** Observed (blue), calculated (red) and difference (green) X-ray powder diffraction patterns for  $\text{EuLnCuSe}_3$  after crystal structure refinement.

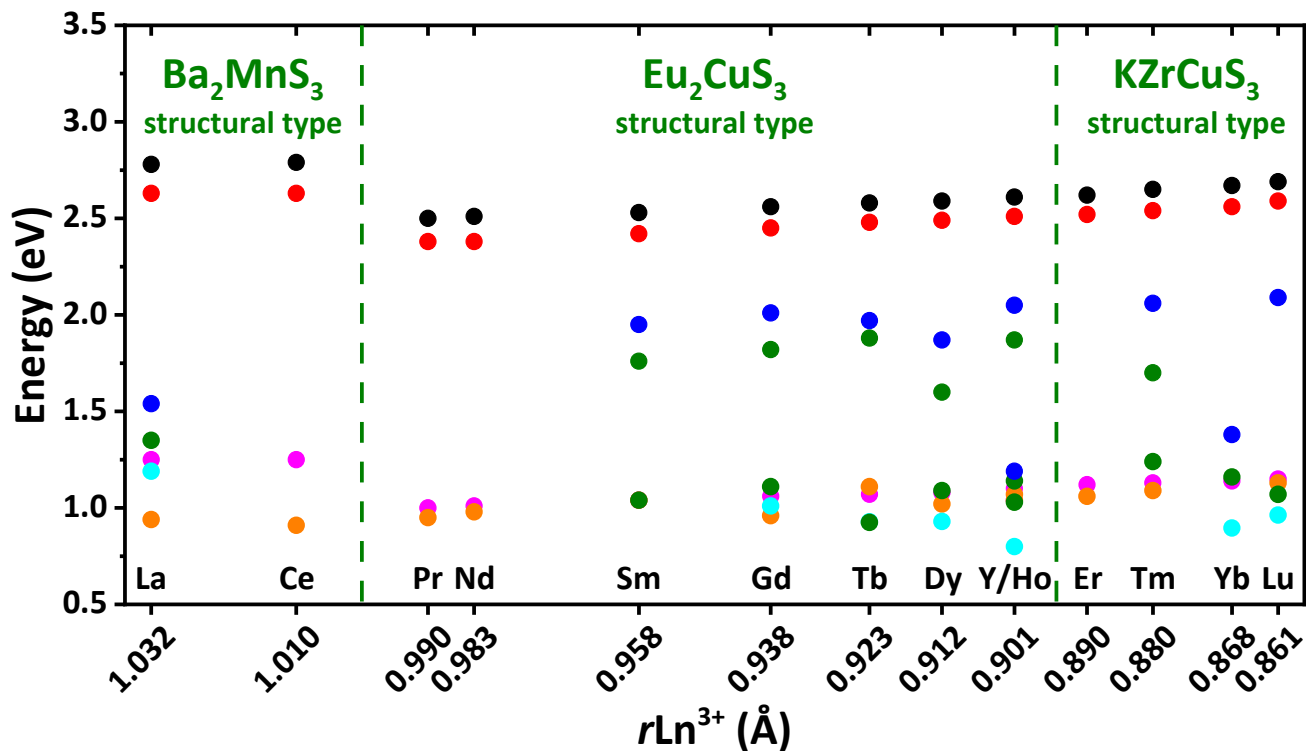

**Figure S3.** The band gap values of  $\text{EuLnCuSe}_3$ . Black = band gap from the PBE0 simulation (this work, Table 2); red = band gap from the B3LYP simulation (this work, Table 2); blue = experimental direct band gap (this work, Table 2); green = band gap from uncorrected Kubelka-Munk function; magenta = PBE simulation (this work, Table 2); cyan = experimental indirect band gap (this work, Table 2); orange = non-hybrid PBE simulation [32].

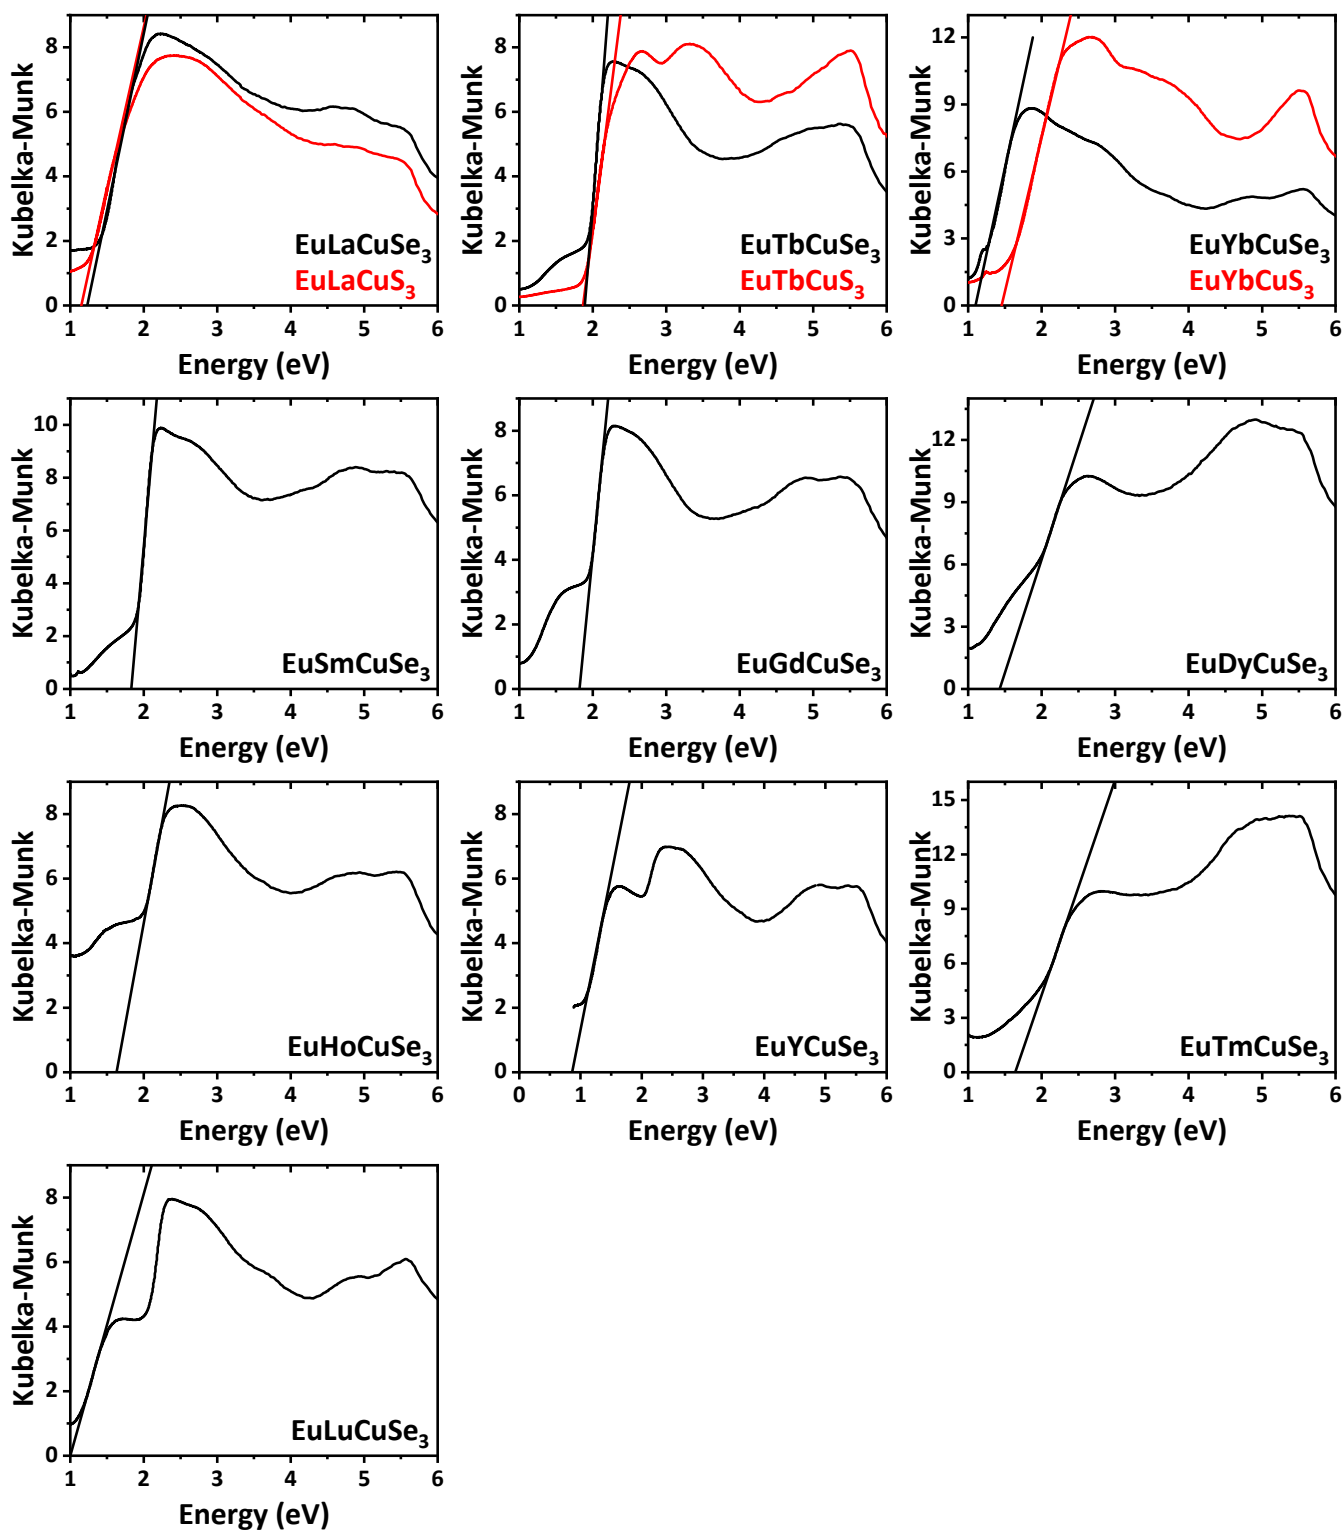

Figure S4. The Kubelka-Munk spectra of EuLnCuSe<sub>3</sub>, and EuLaCuS<sub>3</sub>, EuTbCuS<sub>3</sub> and EuYbCuS<sub>3</sub>.



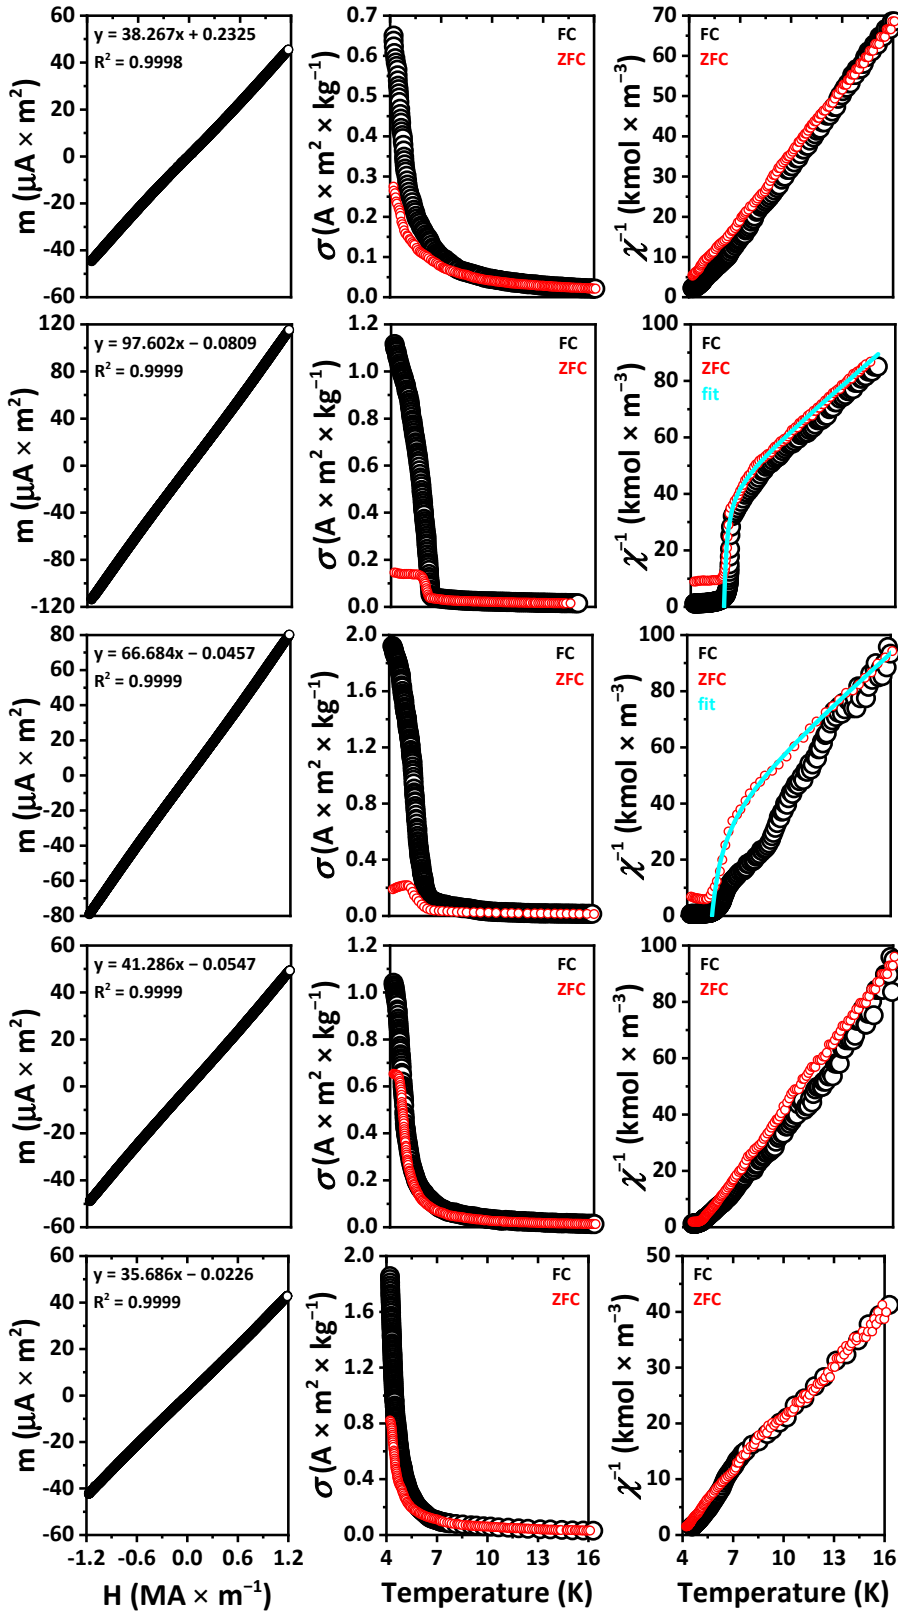

**Figure S5.** Field-dependent magnetic moments at 296 K (left), and temperature-dependent specific magnetization (middle) and reciprocal magnetic susceptibility (right) of (from top to bottom) EuYCuSe<sub>3</sub>, EuTbCuSe<sub>3</sub>, EuDyCuSe<sub>3</sub>, EuYbCuSe<sub>3</sub> and EuLuCuSe<sub>3</sub>, respectively, at 10 Oe. The measurements of low-temperature magnetization were performed in the zero-field cooled (ZFC) and nonzero-field cooled (FC) modes. Fit line shows approximation by the Néel model of a ferrimagnet [80].
